# Supplementary material for: Stereocontrolled synthesis of carbocycles via four successive pericyclic reactions
Source: Royal Society of Chemistry journal article supplement (doi:10.1039/b803898h), 2008-01-01

# Supporting Information

## Stereocontrolled Synthesis of Carbocycles via Four Successive Pericyclic Reactions

Roxanne Clément, Christiane M. Grisé and Louis Barriault\*

10 Marie Curie, Department of Chemistry, University of Ottawa, Ottawa, Canada  
K1N 6N5

|                                                                                                                     |    |
|---------------------------------------------------------------------------------------------------------------------|----|
| General.....                                                                                                        | 1  |
| Experimental procedures for compounds <b>7</b> , <b>14</b> , <b>17</b> and <b>20</b> .....                          | 1  |
| Spectroscopic data for compounds <b>9-13</b> , <b>15-16</b> , <b>18-19</b> and <b>21-25</b> .....                   | 6  |
| <sup>1</sup> H and <sup>13</sup> C NMR spectra for <b>9-13</b> , <b>15-16</b> , <b>18-19</b> and <b>21-23</b> ..... | 12 |

### General

All reactions were performed under nitrogen or argon atmosphere in flame-dried glassware equipped with a magnetic stir bar and a rubber septum, unless otherwise indicated. All solvents were freshly distilled prior to use; diethyl ether and THF over sodium and benzophenone; toluene, DMF, triethylamine, DMSO, DME, and DCM over calcium hydride. MgBr<sub>2</sub>·OEt<sub>2</sub> was prepared in our laboratory and stored in the glove box. All other commercial reagents were used without purification, unless otherwise noted. Reactions were monitored by thin layer chromatography (TLC) analysis of aliquots using glass sheets pre-coated (0.2 mm layer thickness) with silica gel 60 F<sub>254</sub> (E. Merck). Thin layer chromatography plates were viewed under UV light and stained with phosphomolybdic acid or *p*-anisaldehyde staining solution. Column chromatographies were carried out with silica gel 60 (230-400 mesh, Merck). <sup>1</sup>H and <sup>13</sup>C NMR spectra were recorded in deuterated solvents, on Bruker AMX 300 MHz and Bruker AMX 500 MHz spectrometers. IR spectra were recorded with a Bomem Michelson 100 FTIR spectrometer. HRMS were obtained on a Kratos Analytical Concept instrument (University of Ottawa Mass Spectrum Centre). Microwave reactions were conducted in a CEM Model ESP-1500 Plus oven, equipped with a EST-300 Plus temperature probe. All experiments were effected in a quartz tube in the presence of two carboflons.<sup>TM</sup>

### 2-Isopropenyl-cyclohexanol and 2-Isopropenyl-cyclohexanone (A)

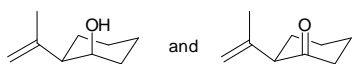

A dry round bottom flask was charged with CuBr·DMS (4.810 g, 23.4 mmol) and THF (300 mL). The solution was cooled to -30 °C, followed by the addition of isopropenylmagnesium bromide (608.0 mL, 0.304 mol). The mixture was stirred for 20 minutes, at which point cyclohexene oxide (22.96 g, 0.234 mol) was added and the solution was stirred to room temperature. The reaction was followed by TLC and quenched with NH<sub>4</sub>Cl (sat. aq.) upon completion.

The mixture was extracted with diethyl ether (3x) and the combined organic layers were dried over MgSO<sub>4</sub>, filtered, and concentrated. A dry round bottom flask was charged with oxalyl chloride (9.69 mL, 0.111 mol) and DCM (200 mL). The solution was cooled to -78 °C, and DMSO (15.8 mL, 0.222 mol) was slowly added. After 20 minutes of stirring, the crude alcohol in DCM (20 mL) was added to give an opaque white mixture. The latter was stirred at -78 °C for 1.5 hours, followed by the addition of triethylamine (64.4 mL, 0.463 mol). The solution was again stirred at 0 °C for an additional hour and quenched with NH<sub>4</sub>Cl (sat. aq.). The mixture was extracted with DCM (3x) and the combined organic layers were dried over MgSO<sub>4</sub>, filtered, and concentrated. Flash chromatography (3-10% ethyl acetate in hexanes) afforded **A** (9.690 g, 76% over two steps) as a yellow oil. Characterization data is available through the literature.<sup>1</sup>

### 1-Ethynyl-2-isopropenyl-cyclohexanol (**B**)

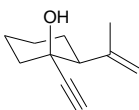

To a solution of ketone **A** (1.055 g, 15.9 mmol) in THF (40 mL) at 0 °C was added dropwise ethynylmagnesium bromide (94.8 mL, 47.4 mmol). The solution was warmed to room temperature and allowed to stir overnight. The reaction was quenched with NH<sub>4</sub>Cl (sat. aq.) and the mixture was extracted with diethyl ether (3x). The combined organic layers were dried over MgSO<sub>4</sub>, filtered, and concentrated. Flash chromatography (5% ethyl acetate in hexanes) afforded the major diastereoisomer (60:40) **B** as a yellow oil (2.421 g, 59%). IR (neat, cm<sup>-1</sup>) 3548 (m), 3468 (br), 3307 (s), 3079 (w), 2938 (s), 2856 (s), 1639 (m), 1447 (m), 1071 (m), 972 (s); <sup>1</sup>H NMR (CDCl<sub>3</sub>, 300 MHz) δ 4.95 (s, 1H), 4.79 (s, 1H), 2.37 (s, 1H), 2.23 (s, 1H), 2.18-2.08 (m, 2 H), 1.92 (s, 3H), 1.72-1.37 (m, 6H), 1.28-1.12 (m, 1H); <sup>13</sup>C NMR (CDCl<sub>3</sub>, 75 MHz) δ 148.4 (C), 112.8 (CH<sub>2</sub>), 89.0 (C), 71.7 (CH), 67.4 (C), 52.8 (CH), 40.1 (CH<sub>2</sub>), 27.0 (CH<sub>2</sub>), 26.1 (CH<sub>3</sub>), 26.1 (CH<sub>2</sub>), 20.8 (CH<sub>2</sub>); HRMS (EI) m/z calcd for C<sub>11</sub>H<sub>14</sub> [(M-H<sub>2</sub>O)<sup>+</sup>] 146.1095, found 146.1095.

### 1-Ethynyl-2-isopropenyl-1-prop-2-ynoxy-cyclohexane (**7**)

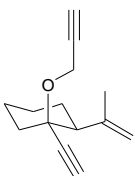

To a solution of **B** (2.545 g, 15.5 mmol) and propargyl bromide (5.16 mL, 46.0 mmol) in THF/DMF (9:3 mL) was added sodium hydride 60% in oil (1.860 g, 46.0 mmol) slowly at room temperature. The reaction was followed by TLC and quenched with NH<sub>4</sub>Cl (sat. aq.) upon completion. The mixture was extracted with diethyl ether (3x) and the combined organic layers were dried over MgSO<sub>4</sub>, filtered, and concentrated. Flash chromatography (5% ethyl acetate in hexanes) afforded **7** (2.568 g, 81%) as a yellow oil. IR (neat, cm<sup>-1</sup>) 3303 (s), 3073 (m), 2934 (s), 2858 (s), 1641 (m), 1448 (m), 1376 (m), 1143 (m), 1094 (s), 1063 (s), 892 (s); <sup>1</sup>H NMR (CDCl<sub>3</sub>) δ 4.81 (d, J = 1.2 Hz, 2H), 4.24 (dd, J<sub>AB</sub> = 15.2 Hz, J<sub>AX</sub> = 2.5 Hz, 1H), 4.13 (dd, J<sub>AB</sub> = 15.2 Hz, J<sub>BX</sub> = 2.5 Hz, 1H), 2.48 (s, 1H), 2.34 (t, J = 2.5 Hz, 1H), 2.25-2.12 (m, 2H), 1.86 (qd, J = 12.4, 3.7 Hz, 1H), 1.78 (s, 3H), 1.75-1.67 (m, 1H), 1.60-1.38 (m, 4H), 1.33-1.16 (m, 1H); <sup>13</sup>C NMR (CDCl<sub>3</sub>) δ 146.6 (C), 113.5 (CH<sub>2</sub>), 84.2 (C), 80.9 (C), 75.9 (C), 74.9 (CH), 73.1 (CH), 54.3 (CH), 51.9 (CH<sub>2</sub>), 35.8 (CH<sub>2</sub>),

<sup>1</sup> (a) Onishi, T.; Nishida, T. *J. Chem. Soc.* **1978**, 651. (b) Fujita, Y.; Onishi, T.; Nishida, T. *Synthesis* **1978**, 12, 934. (c) Utagawa, A.; Hirota, H.; Ohno, S.; Takahashi, T. *Bull. Chem. Soc. Jpn.* **1988**, 61, 1207.

26.2 (CH<sub>2</sub>), 25.7 (CH<sub>2</sub>), 22.1 (CH<sub>3</sub>), 20.6 (CH<sub>2</sub>); HRMS (EI) m/z calcd for C<sub>14</sub>H<sub>18</sub>O (M<sup>+</sup>) 202.1358, found 202.1348.

### 2-Isopropenyl-cyclopentanone (C)

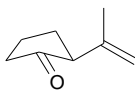

A dry round bottom flask was charged with CuBr·DMS (0.733 g, 3.57 mmoles) and THF (100 mL). The solution was cooled to -30 °C, followed by the addition of isopropenylmagnesium bromide (92.7 mL, 46.4 mmoles). The mixture was stirred for 20 minutes, at which point cyclopentene oxide (3.11 mL, 36.0 mmoles) was added and the solution was stirred to room temperature. The reaction was followed by TLC and quenched with NH<sub>4</sub>Cl (sat. aq.) upon completion. The mixture was extracted with diethyl ether (3x) and the combined organic layers were dried over MgSO<sub>4</sub>, filtered, and concentrated. The residue was re-dissolved in diethyl ether (50 mL) and Jones' reagent (20.6 mL, 53.5 mmoles) was slowly added at 0 °C. The reaction was allowed to reach room temperature. Upon completion, as observed by TLC analysis, the reaction was quenched with NH<sub>4</sub>Cl (sat. aq.). The mixture was extracted with diethyl ether (3x) and the combined organic layers were dried over MgSO<sub>4</sub>, filtered, and concentrated. Flash chromatography (15% ethyl acetate in hexanes) afforded **C** (2.145 g, 48%) as a yellow oil. Characterization data is available through the literature.<sup>2</sup>

### 1-Ethynyl-2-isopropenyl-cyclopentanol (D)

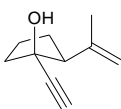

To a solution of ketone **C** (2.145 g, 17.3 mmol) in THF (40 mL) at 0 °C was added dropwise ethynylmagnesium bromide (69.1 mL, 34.6 mmol). The reaction was warmed to room temperature and stirred until completion by TLC, at which point it was quenched with NH<sub>4</sub>Cl (sat. aq.). The mixture was extracted with diethyl ether (3x) and the combined organic layers were dried over MgSO<sub>4</sub>, filtered, and concentrated. Flash chromatography (10% ethyl acetate in hexanes) afforded the major diastereoisomer (66:34) **D** as a yellow oil (0.989 g, 38%). IR (neat, cm<sup>-1</sup>) 3496 (br), 3305 (s), 3085 (w), 2969 (s), 2923 (m), 2875 (m), 1640 (m), 1450 (m), 1376 (m), 1019 (m), 896 (m), 649 (m); <sup>1</sup>H NMR (CDCl<sub>3</sub>, 300 MHz) δ 5.03 (s, 1H), 4.89 (s, 1H), 2.60 (m, 1H), 2.41 (s, 1H), 2.19-1.97 (m, 3H), 1.92 (s, 3H), 1.85-1.53 (m, 4H); <sup>13</sup>C NMR (CDCl<sub>3</sub>, 75 MHz) δ 143.9 (C), 113.5 (CH), 87.9 (C), 73.2 (C), 71.8 (CH), 57.9 (CH), 42.2 (CH<sub>2</sub>), 28.4 (CH<sub>2</sub>), 25.2 (CH<sub>3</sub>), 21.8 (CH<sub>2</sub>); HRMS (EI) m/z calcd for C<sub>10</sub>H<sub>14</sub>O (M<sup>+</sup>) 150.1045, found 150.1016.

### 1-Ethynyl-2-isopropenyl-1-prop-2-ynyloxy-cyclopentane (14)

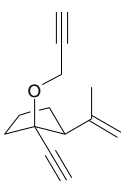

To a solution of **D** (2.070 g, 13.8 mmol) and propargyl bromide (4.61 mL, 41.4 mmol) in THF/DMF (30:10 mL) was added sodium hydride 60% in oil (1.656 g, 41.4 mmol) slowly at room temperature. The reaction was followed by TLC and quenched with a saturated aqueous solution of NH<sub>4</sub>Cl upon

<sup>2</sup> Sate, T.; Takezoe, K. *Tetrahedron Lett.* **1991**, 32, 4003.

completion. The mixture was extracted with diethyl ether (3x) and the combined organic layers were dried over  $\text{MgSO}_4$ , filtered, and concentrated. Flash chromatography (5% ethyl acetate in hexanes) afforded **14** (2.234 g, 86%) as a yellow oil. IR (neat,  $\text{cm}^{-1}$ ) 3297 (s), 3076 (w), 2970 (s), 2875 (m), 1640 (m), 1451 (m), 1375 (m), 1185 (m), 1065 (s), 894 (s);  $^1\text{H}$  NMR ( $\text{CDCl}_3$ , 300 MHz) 4.88-4.86 (m, 2H), 4.25 (dd,  $J_{\text{AB}} = 15.5$  Hz,  $J_{\text{AX}} = 25$  Hz, 1H), 4.16 (dd,  $J_{\text{AB}} = 15.5$  Hz,  $J_{\text{BX}} = 2.5$  Hz, 1H), 2.62-2.54 (m, 1H), 2.54 (s, 1H), 2.33 (t,  $J = 2.5$  Hz, 1H), 2.32-2.24 (m, 1H), 2.03-1.86 (m, 2H), 1.85 (s, 3H), 1.83-1.56 (m, 3H);  $^{13}\text{C}$  NMR ( $\text{CDCl}_3$ , 75 MHz)  $\delta$  143.7 (C), 113.7 ( $\text{CH}_2$ ), 84.2 (C), 82.6 (C), 81.4 (C), 75.2 (CH), 73.7 (CH), 58.3 (CH), 53.3 ( $\text{CH}_2$ ), 38.9 ( $\text{CH}_2$ ), 28.1 ( $\text{CH}_2$ ), 23.0 ( $\text{CH}_3$ ), 21.6 ( $\text{CH}_2$ ); HRMS (EI)  $m/z$  calcd for  $\text{C}_{13}\text{H}_{16}\text{O}$  ( $\text{M}^+$ ) 188.1201, found 188.1117.

## 2-Ethynyl-bicyclohexyl-1'-en-2-ol (E)

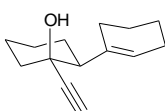

To a solution of 2-(1-cyclohexenyl)-cyclohexanone (3.99 g, 22.4 mmol) in THF (60 mL) at 0 °C was added dropwise ethynylmagnesium bromide (67.2 mL, 33.6 mmol). The reaction was warmed to room temperature and stirred until completion by TLC, at which point it was quenched with  $\text{NH}_4\text{Cl}$  (sat. aq.). The mixture was extracted with diethyl ether (3x) and the combined organic layers were dried over  $\text{MgSO}_4$ , filtered, and concentrated. Flash chromatography (5% ethyl acetate in hexanes) afforded the major diastereoisomer (60:40) **E** as a white solid (2.454 g, 54%). IR (neat,  $\text{cm}^{-1}$ ) 3439 (br), 3253 (m), 2939 (w), 1642 (m);  $^1\text{H}$  NMR ( $\text{CDCl}_3$ , 300 MHz)  $\delta$  5.53 (s, 1H), 2.51-2.40 (m, 1H), 2.34 (s, 1H), 2.25 (s, 1H), 2.13-2.06 (m, 1H), 2.04-1.89 (m, 4H), 1.71-1.32 (m, 10H), 1.26-1.11 (m, 1H);  $^{13}\text{C}$  NMR ( $\text{CDCl}_3$ , 75 MHz) 140.8 (C), 123.8 (CH), 89.4 (C), 71.4 (CH), 67.6 (C), 53.0 (CH), 39.9 ( $\text{CH}_2$ ), 32.3 ( $\text{CH}_2$ ), 26.8 ( $\text{CH}_2$ ), 26.3 ( $\text{CH}_2$ ), 25.7 ( $\text{CH}_2$ ), 23.4 ( $\text{CH}_2$ ), 22.8 ( $\text{CH}_2$ ), 20.9 ( $\text{CH}_2$ ); HRMS (EI)  $m/z$  calcd for  $\text{C}_{14}\text{H}_{20}\text{O}$  ( $\text{M}^+$ ) 204.1514, found 204.1498; m.p. 77.5-78.3 °C.

## 2'-Ethynyl-2'-prop-2'-ynyloxy-bicyclohexyl-1-ene (20)

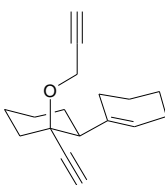

To a solution of **E** (0.800 g, 3.92 mmol) and propargyl bromide (1.53 mL, 13.7 mmol) in THF/DMF (9:3 mL) was added sodium hydride 60% in oil (0.548 g, 13.7 mmol) slowly at room temperature. The reaction was followed by TLC and quenched with  $\text{NH}_4\text{Cl}$  (sat. aq.) upon completion. The mixture was extracted with diethyl ether (3x) and the combined organic layers were dried over  $\text{MgSO}_4$ , filtered, and concentrated. Flash chromatography (5% ethyl acetate in hexanes) afforded **20** (0.938 g, 99%) as a colourless oil. IR (neat,  $\text{cm}^{-1}$ ) 3307 (s), 2930 (s), 2856 (s), 1447 (m), 1137 (m), 1091 (m), 1072 (m), 1056 (m);  $^1\text{H}$  NMR ( $\text{CDCl}_3$ , 300 MHz)  $\delta$  5.54 (s, 1H), 4.26 (dd,  $J_{\text{AB}} = 15.2$  Hz,  $J_{\text{AX}} = 2.5$  Hz, 1H), 4.15 (dd,  $J_{\text{AB}} = 15.2$  Hz,  $J_{\text{BX}} = 2.5$  Hz, 1H), 2.44 (s, 1H), 2.34 (t,  $J = 2.4$  Hz, 1H), 2.17 (m, 2H), 1.98 (m, 4H), 1.85 (qd,  $J = 12.6, 3.5$  Hz, 1H), 1.73-1.69 (m, 1H), 1.58-1.36 (m, 8H), 1.32-1.21 (m, 1H);  $^{13}\text{C}$  NMR ( $\text{CDCl}_3$ , 75 MHz)  $\delta$  138.9 (C), 124.7 (CH), 84.8 (C), 81.5 (C), 76.7 (C), 75.1 (CH), 73.4 (CH), 55.3 (CH), 52.3 ( $\text{CH}_2$ ), 36.5 ( $\text{CH}_2$ ), 28.1 ( $\text{CH}_2$ ), 26.5 ( $\text{CH}_2$ ), 26.3 ( $\text{CH}_2$ ), 25.8 ( $\text{CH}_2$ ), 23.7 ( $\text{CH}_2$ ), 23.0 ( $\text{CH}_2$ ), 20.1 ( $\text{CH}_2$ ); HRMS (EI)  $m/z$  calcd for  $\text{C}_{17}\text{H}_{22}\text{O}$  ( $\text{M}^+$ ) 242.1671, found 242.1625.

## 2-Isopropenyl-2-methyl-cyclohexanone (F)

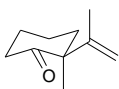

To a solution of sodium methoxide (5.330 g, 38.6 mmoles) in THF (100 mL) at 0 °C was added ketone **A** (2.633 g, 46.3 mmol) in THF (20 mL) *via* canula. The solution was stirred for 20 minutes and freshly distilled methyl iodide (2.40 mL, 38.6 mmoles) was added. The reaction was followed by TLC and quenched with NH<sub>4</sub>Cl (sat. aq.) upon completion. The mixture was extracted with diethyl ether (3x) and the combined organic layers were dried over MgSO<sub>4</sub>, filtered, and concentrated. Flash chromatography (3% hexanes in benzene) afforded **F** as a yellow oil. (3.73 g, 64%). IR (neat, cm<sup>-1</sup>) 2967 (m), 2937 (s), 2865 (m), 1710 (s), 1638 (m), 1449 (m), 898 (m); <sup>1</sup>H NMR (CDCl<sub>3</sub>, 300 MHz) δ 4.90 (s, 1H), 4.69 (s, 1H), 2.52-2.42 (m, 1H), 2.27-2.17 (m, 2H), 1.97-1.87 (m, 1H), 1.72-1.53 (m, 3H), 1.63 (s, 3H), 1.44-1.33 (m, 1H), 1.06 (s, 3H); <sup>13</sup>C NMR (CDCl<sub>3</sub>, 75 MHz) δ 214.5 (C), 146.7 (C), 112.3 (CH<sub>2</sub>), 55.2 (C), 39.8 (CH<sub>2</sub>), 37.9 (CH<sub>2</sub>), 27.9 (CH<sub>2</sub>), 24.5 (CH<sub>3</sub>), 21.8 (CH<sub>2</sub>), 19.5 (CH<sub>3</sub>); HRMS (EI) m/z calcd for C<sub>10</sub>H<sub>16</sub>O (M<sup>+</sup>) 152.1201, found 152.1329

## 1-Ethynyl-2-isopropenyl-2-methyl-cyclohexanol (G)

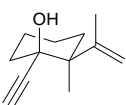

To a solution of ketone **F** (3.736 g, 24.6 mmol) in THF (100 mL) at room temperature was added dropwise ethynylmagnesium bromide (73.7 mL, 36.9 mmol). The reaction was warmed to room temperature and allowed to stir until completion by TLC, at which point it was quenched with NH<sub>4</sub>Cl (sat. aq.). The mixture was extracted with diethyl ether (3x) and the combined organic layers were dried over MgSO<sub>4</sub>, filtered, and concentrated. Flash chromatography (10% ethyl acetate in hexanes) afforded the major diastereoisomer (63:37) **G** as a yellow oil (1.712 g, 39%). IR (neat, cm<sup>-1</sup>) 2537 (br m), 2206 (m), 2933 (s), 2867 (m), 1625 (m), 1445 (m), 981 (s); <sup>1</sup>H NMR (CDCl<sub>3</sub>, 300 MHz) δ 5.08 (s, 1H), 5.03 (s, 1H), 2.47 (s, 1H), 2.40 (s, 1H), 1.98 (s, 3H), 1.99-1.78 (m, 3H), 1.63-1.38 (m, 4H), 1.27 (s, 3H), 1.28-1.17 (m, 1H); <sup>13</sup>C NMR (CDCl<sub>3</sub>, 75 MHz) δ 150.6 (C), 114.5 (CH<sub>2</sub>), 88.3 (C), 72.4 (CH), 70.1 (C), 45.5 (C), 35.3 (CH<sub>2</sub>), 31.1 (CH<sub>2</sub>), 23.0 (CH<sub>3</sub>), 20.9 (CH<sub>2</sub>), 20.1 (CH<sub>2</sub>), 20.0 (CH<sub>3</sub>); HRMS (EI) m/z calcd for C<sub>11</sub>H<sub>15</sub>O [(M-CH<sub>3</sub>)<sup>+</sup>] 163.1123, found 163.1130.

## 1-Ethynyl-2-isopropenyl-2-methyl-1-prop-2-ynoxy-cyclohexane (17)

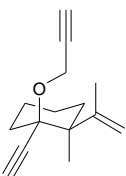

To a solution of **G** (1.712 g, 9.62 mmol) and propargyl bromide (5.36 mL, 48.1 mmol) in THF/DMF (18:6 mL) was added sodium hydride 60% in oil (1.924 g, 48.1 mmol) slowly at room temperature. The reaction was followed by TLC and quenched with NH<sub>4</sub>Cl (sat. aq.) upon completion. The mixture was extracted with diethyl ether (3x) and the combined organic layers were dried over MgSO<sub>4</sub>, filtered, and concentrated. Flash chromatography (10% hexanes in benzene) afforded **17** (1.89 g, 91%) as a yellow oil. IR (neat, cm<sup>-1</sup>) 3302 (s), 3095 (w), 2933 (s), 2886 (m), 1630 (m), 1445 (m), 1374 (m), 1087 (s), 1066 (s), 895 (m); <sup>1</sup>H NMR (CDCl<sub>3</sub>; 300 MHz) δ 5.01 (s, 1H), 4.94-4.93 (m, 1H), 4.26 (dd, J<sub>AB</sub> = 15.5 Hz, J<sub>AX</sub> = 2.5 Hz, 1H), 4.17 (dd, J<sub>AB</sub> = 15.5 Hz, J<sub>BX</sub> = 2.5 Hz, 1H), 2.54 (s, 1H), 2.33 (t, J = 2.5 Hz, 1H), 2.12-1.98 (m, 2H), 1.89 (s, 3H), 1.81-1.70 (m, 1H), 1.61-1.32 (m, 5H), 1.24

(s, 3H);  $^{13}\text{C}$  NMR ( $\text{CDCl}_3$ ; 75 MHz)  $\delta$  150.3 (C), 113.2 ( $\text{CH}_2$ ), 83.7 (C), 81.1 (C), 80.5 (C), 76.5 (CH), 73.0 (CH), 52.0 ( $\text{CH}_2$ ), 45.3 (C), 32.1 ( $\text{CH}_2$ ), 31.4 ( $\text{CH}_2$ ), 23.1 ( $\text{CH}_3$ ), 22.3 ( $\text{CH}_3$ ), 21.0 ( $\text{CH}_2$ ), 20.8 ( $\text{CH}_2$ ); HRMS (EI)  $m/z$  calcd for  $\text{C}_{14}\text{H}_{17}\text{O}$  [ $\text{M}-\text{CH}_3$ ] $^+$  201.1279, found 201.1272.

Typical procedure :

**1-(4b-Hydroxy-3,9-dimethylene-1,2,3,4b,5,6,7,8,8a,9,10,10a-dodecahydro-phenanthren-1-yl)-ethanone (11)**

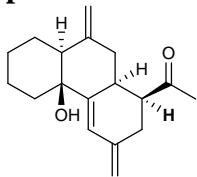

To a microwave quartz cell (100 mL) containing a glass-coated CARBOFLON<sup>TM</sup> (2 cm) was added a solution of **7** (47 mg, 0.23 mmol) in toluene (10 mL) and triethylamine (2.3 mmol). After bubbling argon for 20 minutes, the solution was heated at 207°C for 60 minutes using microwaves (600 W). The solution was cooled to room temperature and concentrated. The residue was dissolved in dichloromethane (2 mL) and added to a solution of 2,6-lutidine (0.11 mL, 0.92 mmol) and  $\text{MgBr}_2\text{-OEt}_2$  (118.8 mg, 0.46 mmol) in dichloromethane (4 mL) previously stirred for 30 minutes. After stirring for 2 hours at room temperature, methyl vinyl ketone (40.3 mg, 0.575 mmol) was added. The solution was stirred for overnight and quenched with a saturated solution of ammonium chloride. The mixture was extracted with dichloromethane (3X) and the combined organic phases were dried over  $\text{MgSO}_4$ , filtered and concentrated. The residue was purified by flash chromatography (10% ethyl acetate in hexanes) to afford **11** (31 mg, 49%) as a yellow oil.  $^1\text{H}$  NMR ( $\text{CDCl}_3$ , 300 MHz)  $\delta$  6.43 (s, 1H), 4.88 (s, 1H), 4.85-4.83 (m, 2H), 4.71 (s, 1H), 2.99 (quint.,  $J = 6.2$  Hz, 1H), 2.89 (quint.,  $J = 5.6$  Hz, 1H), 2.44 (d,  $J = 9.9$  Hz, 1H) 2.39-2.08 (m, 4H), 2.18 (s, 3H), 1.91-1.25 (m, 9 H);  $^{13}\text{C}$  NMR ( $\text{CDCl}_3$ , 75 MHz)  $\delta$  209.4 (C), 149.7 (C), 145.7 (C), 141.3 (C), 125.2 (CH), 112.6 ( $\text{CH}_2$ ), 109.9 ( $\text{CH}_2$ ), 72.6 (C), 49.9 (CH), 46.6 (CH), 37.0 ( $\text{CH}_2$ ), 32.9 ( $\text{CH}_2$ ), 32.5 (CH), 28.8 ( $\text{CH}_3$ ), 27.6 ( $\text{CH}_2$ ), 25.7 ( $\text{CH}_2$ ), 22.6 ( $\text{CH}_2$ ), 21.4 ( $\text{CH}_2$ ); IR (neat,  $\text{cm}^{-1}$ ) 3498 (br), 3078 (w), 2931 (s), 2856 (m), 1709 (s), 1644 (m), 1608 (w), 1436 (m), 1355 (m), 971 (m), 888 (s); HRMS (EI)  $m/z$  calcd for  $\text{C}_{18}\text{H}_{24}\text{O}_2$  ( $\text{M}^+$ ) 272.1776, found 272.1813.

**4b-Hydroxy-3,9-dimethylene-1,2,3,4b,5,6,7,8,8a,9,10,10a-dodecahydro-phenanthrene-1-carboxylic acid methyl ester (9)**

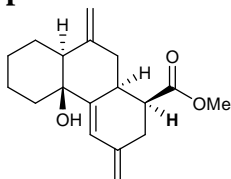

IR (neat,  $\text{cm}^{-1}$ ) 3517 (br), 3079 (w), 2931 (s), 2856 (m), 1737 (s), 1644 (m), 1608 (w), 1437 (m), 1276 (m), 1203 (m), 1165 (m), 891 (m);  $^1\text{H}$  NMR ( $\text{CDCl}_3$ , 300 MHz)  $\delta$  6.42 (s, 1H), 4.89 (s, 1H), 4.85 (s, 2H), 4.71 (s, 1H), 3.69 (s, 3H), 2.96 (quint.,  $J = 6.2$  Hz, 1H), 2.84 (quint.,  $J = 5.6$  Hz, 1H), 2.48-2.11 (m, 6H), 1.90-1.40 (m, 8H);  $^{13}\text{C}$  NMR ( $\text{CDCl}_3$ , 75 Hz)  $\delta$  174.4 (C), 150.2 (C), 146.4 (C), 141.5 (C), 125.3 (CH), 113.0 ( $\text{CH}_2$ ), 110.1 ( $\text{CH}_2$ ), 73.0 (C), 52.0 ( $\text{CH}_3$ ), 46.9 (CH), 42.4 (CH), 37.3 ( $\text{CH}_2$ ), 33.5 ( $\text{CH}_2$ ), 33.0 (CH), 28.5 ( $\text{CH}_2$ ), 26.1 ( $\text{CH}_2$ ), 23.0 ( $\text{CH}_2$ ), 21.8 ( $\text{CH}_2$ ); HRMS (EI)  $m/z$  calcd for  $\text{C}_{18}\text{H}_{22}\text{O}_2$  [ $\text{M}-\text{H}_2\text{O}$ ] $^+$  270.1620, found 270.1565.

**4b-Hydroxy-1-methyl-3,9-dimethylene-1,2,3,4b,5,6,7,8,8a,9,10,10a-dodecahydro-phenanthrene-1-carboxylic acid methyl ester (10)**

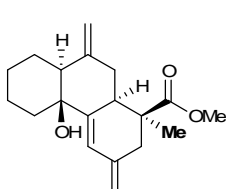

IR (neat,  $\text{cm}^{-1}$ ) 3524 (br), 3078 (w), 2933 (s), 2857 (m), 1732 (s), 1644 (m), 1435 (m), 1255 (m), 1236 (m), 1109 (m), 891 (m);  $^1\text{H}$  NMR

(CDCl<sub>3</sub>, 300 MHz)  $\delta$  6.38 (s, 1H), 4.93 (s, 1H), 4.88 (s, 1H), 4.82 (s, 1H), 4.68 (s, 1H), 3.67 (s, 3H), 2.58-2.50 (m, 2H), 2.46-2.36 (m, 2H), 2.19 (d, J = 14.9 Hz, 1H), 2.15-2.04 (m, 1H), 1.86-1.25 (m, 9H), 1.16 (s, 3H); <sup>13</sup>C NMR (CDCl<sub>3</sub>, 75 MHz)  $\delta$  148.3 (C), 146.1 (C), 140.3 (C), 123.6 (CH), 113.5 (CH<sub>2</sub>), 109.1 (CH<sub>2</sub>), 76.4 (C), 72.4 (C), 51.5 (CH<sub>3</sub>), 46.4 (CH), 43.7 (C), 39.7 (CH), 36.5 (CH<sub>2</sub>), 34.8 (CH<sub>2</sub>), 34.2 (CH<sub>2</sub>), 25.5 (CH<sub>2</sub>), 23.1 (CH<sub>3</sub>), 22.4 (CH<sub>2</sub>), 21.2 (CH<sub>2</sub>); HRMS (EI) m/z calcd for C<sub>19</sub>H<sub>26</sub>O<sub>3</sub> (M<sup>+</sup>) 302.1882, found 302.1863.

#### 4b-Hydroxy-3,9-dimethylene-1,2,3,4b,5,6,7,8,8a,9,10,10a-dodecahydro-phenanthrene-1-carbaldehyde (12)

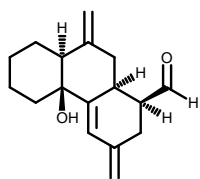

IR (neat, cm<sup>-1</sup>) 3476 (br), 2931 (s), 2854 (m), 2718 (w), 1721 (s), 1642 (m), 1445 (m), 1073 (m), 890 (m); <sup>1</sup>H NMR (CDCl<sub>3</sub>, 300 MHz)  $\delta$  9.75 (d, J = 1.2 Hz, 1H), 6.44 (d, J = 1.9 Hz, 1H), 4.93 (s, 1H), 4.91 (s, 1H), 4.88-4.87 (m, 1H), 4.78-4.77 (m, 1H), 3.02 (quint., J = 6.8 Hz, 1H), 2.76-2.69 (m, 1H), 2.55-2.29 (m, 4H), 1.99 (d, J = 13.0 Hz, 1H), 1.84-1.41 (m, 8H); <sup>13</sup>C NMR (CDCl<sub>3</sub>, 75 MHz)  $\delta$  203.6 (CH), 148.1 (C), 145.8 (C), 139.9 (C), 125.1 (CH), 113.4 (CH<sub>2</sub>), 109.7 (CH<sub>2</sub>), 71.8 (C), 49.1 (CH), 45.4 (CH), 36.7 (CH<sub>2</sub>), 33.1 (CH<sub>2</sub>), 32.1 (CH), 27.8 (CH<sub>2</sub>), 25.3 (CH<sub>2</sub>), 23.2 (CH<sub>2</sub>), 21.2 (CH<sub>2</sub>); HRMS (EI) m/z calcd for C<sub>17</sub>H<sub>22</sub>O<sub>2</sub> (M<sup>+</sup>) 258.1620, found 258.1634.

#### 4b-Hydroxy-3,9-dimethylene-1,2,3,4b,5,6,7,8,8a,9,10,10a-dodecahydro-phenanthrene-1,2-dicarboxylic acid dimethyl ester (13)

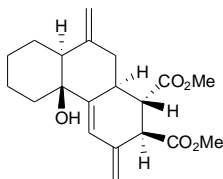

IR (neat, cm<sup>-1</sup>) 3535 (br), 3084 (w), 2931 (m), 2855 (w), 1739 (s), 1643 (w), 1436 (m), 1280 (m), 1260 (m), 1225 (m), 1165 (m), 894 (m); <sup>1</sup>H NMR (CDCl<sub>3</sub>, 300 MHz)  $\delta$  6.41 (s, 1H), 5.03 (d, J = 2.5 Hz, 1H), 4.91 (s, 1H), 4.81 (s, 2H), 3.72 (s, 3H), 3.70 (s, 3H), 3.59-3.53 (m, 1H), 2.78-2.64 (m, 3H), 2.30-2.17 (m, 2H), 2.10-2.02 (m, 1H), 1.84-1.69 (m, 2H), 1.66-1.29 (m, 6H); <sup>13</sup>C NMR (CDCl<sub>3</sub>, 75 MHz)  $\delta$  174.8 (C), 173.1 (C), 147.4 (C), 145.8 (C), 139.6 (C), 125.3 (CH), 113.6 (CH<sub>2</sub>), 110.3 (CH<sub>2</sub>), 71.3 (C), 52.5 (CH<sub>3</sub>), 52.4 (CH<sub>3</sub>), 50.0 (CH), 48.5 (CH), 44.9 (CH), 38.6 (CH<sub>2</sub>), 35.8 (CH<sub>2</sub>), 35.5 (CH), 25.6 (CH<sub>2</sub>), 24.1 (CH<sub>2</sub>), 22.0 (CH<sub>2</sub>); HRMS (EI) m/z calcd for C<sub>20</sub>H<sub>24</sub>O<sub>4</sub> [(M- H<sub>2</sub>O)<sup>+</sup>] 328.1675, found 328.1668.

#### 7,8-Bis-hydroxymethyl-6,10-dimethylene-1,3,4,6,7,8,8a,9,10,10a-decahydro-2H-phenanthren-4a-ol.

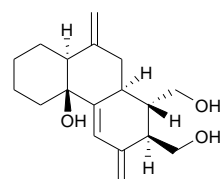

IR (neat, cm<sup>-1</sup>) 3390 (br), 2929 (s), 2850 (m), 1707 (m), 1651 (m), 1447 (m), 1034 (m), 890 (w); <sup>1</sup>H NMR (CDCl<sub>3</sub>; 300 MHz)  $\delta$  6.37 (d, J = 1.9 Hz, 1H), 4.99 (s, 1H), 4.93 (s, 1H), 4.87 (s, 1H), 4.74 (s, 1H), 3.43-3.57 (m, 4H), 2.84-2.74 (m, 1H), 2.58 (quint., J = 6.8 Hz, 1H), 2.44 (q, J = 6.2 Hz, 1H), 2.36 (t, J = 7.4 Hz, 1H), 2.15-1.22 (m, 13H); <sup>13</sup>C NMR (CDCl<sub>3</sub>, 75 MHz)  $\delta$  149.0 (C), 146.5 (C), 142.6 (C), 124.6

(CH), 112.3 (CH<sub>2</sub>), 109.2 (CH<sub>2</sub>), 71.9 (C), 63.9 (CH<sub>2</sub>), 63.1 (CH<sub>2</sub>), 45.7 (CH), 43.3 (CH), 43.3 (CH), 38.0 (CH<sub>2</sub>), 37.4 (CH<sub>2</sub>), 32.3 (CH), 25.5 (CH<sub>2</sub>), 22.8 (CH<sub>2</sub>), 21.6 (CH<sub>2</sub>); HRMS (EI) m/z calcd for C<sub>18</sub>H<sub>24</sub>O<sub>2</sub> [(M-H<sub>2</sub>O)<sup>+</sup>] 272.1776, found 272.1738.

**9b-Hydroxy-4,8-dimethylene-2,3,3a,4,5,5a,6,7,8,9b-decahydro-1H-cyclopenta[a]naphthalene-6-carboxylic acid methyl ester (15)**

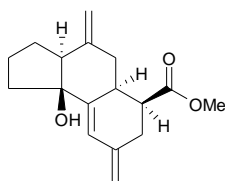

IR (neat, cm<sup>-1</sup>) 3490 (m, br), 3080 (w), 2952 (s), 2870 (m), 1729 (s), 1647 (m), 1429 (m), 1196 (s), 1172 (s), 882 (m); <sup>1</sup>H NMR (CDCl<sub>3</sub>, 300 MHz) δ 6.21 (s, 1H), 4.93 (s, 1H), 4.90 (s, 1H), 4.85 (s, 1H), 4.77 (s, 1H), 3.61 (s, 3H), 2.93-2.89 (m, 1H), 2.78-2.60 (m, 4H), 2.46-2.37 (m, 2H), 2.18 (br. s, 1H), 2.10-1.71 (m, 6H); <sup>13</sup>C NMR (CDCl<sub>3</sub>, 75 MHz) δ 173.6 (C), 146.7 (C), 143.3 (C), 140.0 (C), 124.3 (CH), 113.4 (CH<sub>2</sub>), 109.5 (CH<sub>2</sub>), 80.5 (C), 51.5 (CH<sub>3</sub>), 49.4 (CH), 43.1 (CH), 36.0 (CH), 35.9 (CH<sub>2</sub>), 34.4 (CH<sub>2</sub>), 33.4 (CH<sub>2</sub>), 25.6 (CH<sub>2</sub>), 21.3 (CH<sub>2</sub>); HRMS (EI) m/z calcd for C<sub>17</sub>H<sub>22</sub>O<sub>3</sub> (M<sup>+</sup>) 274.1569, found 274.1583.

**1-(9b-Hydroxy-4,8-dimethylene-2,3,3a,4,5,5a,6,7,8,9b-decahydro-1H-cyclopenta[a]naphthalen-6-yl)-ethanone (16)**

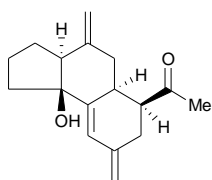

IR (neat, cm<sup>-1</sup>) 3486 (br, m), 2986 (w), 2945 (m), 2859 (m), 1700 (s), 1644 (m), 1361 (m), 1160 (m), 884 (m); <sup>1</sup>H NMR (CDCl<sub>3</sub>, 300 MHz) δ 6.14 (s, 1H), 4.91 (s, 1H), 4.87 (s, 1H), 4.84 (s, 1H), 4.77 (s, 1H), 2.98-2.94 (m, 1H), 2.79-2.74 (m, 4H), 2.58 (s, 1H), 2.45-2.36 (m, 1H), 2.31 (d, J = 11.2 Hz, 1H), 2.11 (s, 3H), 2.06-1.91 (m, 3H), 1.84-1.69 (m, 3H); <sup>13</sup>C NMR (CDCl<sub>3</sub>, 75 MHz) δ 209.6 (C), 146.8 (C), 144.3 (C), 139.7 (C), 123.7 (CH), 113.5 (CH<sub>2</sub>), 109.5 (CH<sub>2</sub>), 80.5 (C), 50.9 (CH), 49.4 (CH), 36.0 (CH), 35.8 (CH<sub>2</sub>), 32.9 (CH<sub>2</sub>), 28.8 (CH<sub>2</sub>), 25.6 (CH<sub>3</sub>), 21.3 (CH<sub>2</sub>); HRMS (EI) m/z calcd for C<sub>17</sub>H<sub>22</sub>O<sub>2</sub> (M<sup>+</sup>) 258.1620, found 258.1620.

**1-(4b-Hydroxy-8a-methyl-3,9-dimethylene-1,2,3,4b,5,6,7,8,8a,9,10,10a-dodecahydro-phenanthren-1-yl)-ethanone (18)**

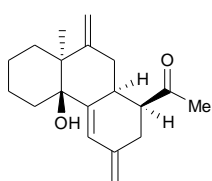

IR (neat, cm<sup>-1</sup>) 3461 (br w), 2927 (s), 2859 (m), 1707 (m), 1445 (w), 1336 (w), 885 (m); <sup>1</sup>H NMR ((CD<sub>3</sub>)<sub>2</sub>CO, 500 MHz) δ 6.26 (s, 1H), 5.01 (s, 1H), 4.86 (s, 1H), 4.83 (s, 1H), 4.68 (s, 1H), 3.38 (d, J = 11.6 Hz, 1H), 2.71-2.65 (m, 1H), 2.55-2.48 (m, 1H), 2.41-2.37 (m, 1H), 2.23-2.11 (m, 1H), 2.15 (s, 3H), 1.98-1.90 (m, 2H), 1.78-1.46 (m, 8H), 1.02 (s, 3H); <sup>13</sup>C NMR (CDCl<sub>3</sub>, 125 MHz) δ 210.2 (C), 154.9 (C), 147.7 (C), 140.7 (C), 123.6 (CH), 113.8 (CH<sub>2</sub>), 108.5 (CH<sub>2</sub>), 73.8 (C), 54.9 (CH), 41.6 (C), 36.2 (CH<sub>2</sub>), 34.5 (CH<sub>2</sub>), 33.6 (CH), 32.6 (CH<sub>2</sub>), 30.4 (CH<sub>2</sub>), 26.7 (CH<sub>3</sub>), 25.9 (CH<sub>3</sub>), 20.8 (CH<sub>2</sub> x 2); HRMS (EI) m/z calcd for C<sub>19</sub>H<sub>26</sub>O<sub>2</sub> (M<sup>+</sup>) 286.1933, found 286.1919.

**4b-Hydroxy-1,8a-dimethyl-3,9-dimethylene-1,2,3,4b,5,6,7,8,8a,9,10,10a-dodecahydro-phenanthrene-1-carbaldehyde (19)**



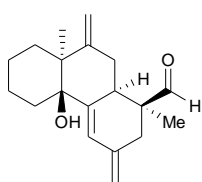

IR (neat,  $\text{cm}^{-1}$ ) 3463 (br w), 2930 (s), 2861 (m), 1718 (s), 1634 (w), 1458 (w), 1444 (w), 1372 (w), 888 (m);  $^1\text{H}$  NMR ( $\text{CDCl}_3$ , 300 MHz)  $\delta$  9.48 (s, 1H), 6.24 (d,  $J = 2.5$  Hz, 1H), 4.92 (s, 1H), 4.89-4.85 (m, 3H), 2.95 (dddd,  $J = 14.3, 14.3, 2.5, 2.5$  Hz, 1H), 2.69-2.35 (m, 5H), 2.07 (br s, 1H), 1.95-1.89 (m, 1H), 1.78-1.52 (m, 6H), 1.18 (s, 3H), 1.01 (s, 3H);  $^{13}\text{C}$  NMR ( $\text{CDCl}_3$ , 75 MHz)  $\delta$  205.3 (CH), 155.3 (C), 143.9 (C), 139.7 (C), 124.7 (CH), 113.9 ( $\text{CH}_2$ ), 108.8 ( $\text{CH}_2$ ), 73.7 (C), 48.8 (C), 41.6 (C), 40.9 (CH,  $\text{CH}_2$ ), 32.9 ( $\text{CH}_2$ ), 30.8 ( $\text{CH}_2$ ), 30.3 ( $\text{CH}_2$ ), 26.2 ( $\text{CH}_3$ ), 21.0 ( $\text{CH}_2$ ), 20.9 ( $\text{CH}_2$ ), 20.3 ( $\text{CH}_3$ ); HRMS (EI)  $m/z$  calcd for  $\text{C}_{19}\text{H}_{26}\text{O}_2$  ( $\text{M}^+$ ) 286.1933, found 286.1928.

**4b-Hydroxy-1-methyl-3-methylene-1,2,3,4b,5,6,7,8,8a,10,11,12,12a,12b-tetradecahydro-triphenylene-1-carbaldehyde (21)**

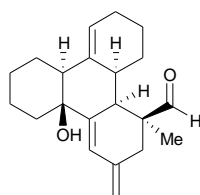

IR (neat,  $\text{cm}^{-1}$ ) 3454 (br w), 2929 (s), 2858 (m), 1720 (s), 1449 (w);  $^1\text{H}$  NMR ( $\text{CDCl}_3$ , 300 MHz)  $\delta$  9.74 (s, 1H), 6.11 (s, 1H), 5.53 (s, 1H), 4.97 (s, 1H), 4.93 (s, 1H), 2.66 (d,  $J = 11.2$  Hz, 1H), 2.36 (q,  $J = 14.7$  Hz, 1H), 2.18-2.08 (m, 1H), 2.03-1.97 (m, 2H), 1.91 (d,  $J = 11.8$  Hz, 1H), 1.84-1.06 (m, 14H), 1.01 (s, 3H);  $^{13}\text{C}$  NMR ( $\text{CDCl}_3$ , 75 MHz)  $\delta$  205.0 (CH), 146.9 (C), 140.2 (C), 139.2 (C), 123.2 (CH), 120.6 (CH), 114.2 ( $\text{CH}_2$ ), 72.5 (C), 51.7 (CH), 48.9 (C), 47.1 (CH), 43.4 (CH), 34.0 ( $\text{CH}_2$ ), 33.2 (CH), 29.7 ( $\text{CH}_2$ ), 25.7 ( $\text{CH}_2$ ), 25.6 ( $\text{CH}_2$ ), 24.2 ( $\text{CH}_2$ ), 21.4 ( $\text{CH}_2$ ), 21.3 ( $\text{CH}_3$ ), 20.7 ( $\text{CH}_2$ ); HRMS (EI)  $m/z$  calcd for  $\text{C}_{21}\text{H}_{28}\text{O}_2$  ( $\text{M}^+$ ) 312.2089, found 312.2077.

**4b-Hydroxy-1,8a-dimethyl-3-methylene-1,2,3,4b,5,6,7,8,8a,10,11,12,12a,12b-tetradecahydro-triphenylene-1-carbaldehyde (22)**

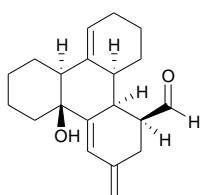

IR (neat,  $\text{cm}^{-1}$ ) 3423 (br w), 2930 (s), 2856 (m), 1718 (m), 1447 (w), 896 (w);  $^1\text{H}$  NMR ( $\text{CDCl}_3$ ; 300 MHz)  $\delta$  9.69 (d,  $J = 4.3$  Hz, 1H), 6.32 (d, 1.9 Hz, 1H), 5.64-5.59 (m, 1H), 4.96 (s, 1H), 4.90 (s, 1H), 2.84 (quint.,  $J = 4.3$  Hz, 1H), 2.69-2.62 (m, 1H), 2.54-2.50 (m, 2H), 2.12-1.17 (m, 17H);  $^{13}\text{C}$  NMR ( $\text{CDCl}_3$ , 75 MHz)  $\delta$  205.5 (CH), 144.6 (C), 139.3 (C), 138.3 (C), 123.4 (CH), 123.3 (CH), 114.2 ( $\text{CH}_2$ ), 72.0 (C), 48.9 (CH), 47.2 (CH), 42.3 (CH), 39.6 (CH), 34.2 ( $\text{CH}_2$ ), 31.3 ( $\text{CH}_2$ ), 27.8 ( $\text{CH}_2$ ), 25.6 ( $\text{CH}_2$ ), 25.5 ( $\text{CH}_2$ ), 24.1 ( $\text{CH}_2$ ), 21.5 ( $\text{CH}_2$ ), 20.7 ( $\text{CH}_2$ ); HRMS (EI)  $m/z$  calcd for  $\text{C}_{20}\text{H}_{24}\text{O}$  [ $(\text{M}-\text{H}_2\text{O})^+$ ] 280.1827, found 280.1824.

**4b-Hydroxy-3-methylene-1,2,3,4b,5,6,7,8,8a,10,11,12,12a,12b-tetradecahydro-triphenylene-1,2-dicarboxylic acid dimethyl ester (23)**

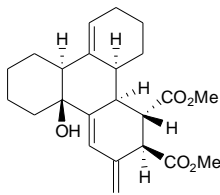

IR (neat,  $\text{cm}^{-1}$ ) 3533 (br w), 2931 (m), 2858 (m), 1739 (s), 1436 (m), 1265 (m), 1167 (m);  $^1\text{H}$  NMR ( $\text{CDCl}_3$ , 300 MHz)  $\delta$  6.47 (s, 1H), 5.36 (s, 1H), 4.97 (s, 1H), 4.71 (s, 1H), 3.74 (s, 3H), 3.69 (s, 3H), 3.47 (d,  $J = 11.2$  Hz, 1H), 3.18-3.04 (m, 2H), 2.61-2.50 (m, 1H), 2.32 (d,  $J = 11.8$  Hz, 1H), 2.19-1.99 (m, 3H), 1.88-1.17 (m, 11H), 0.97-0.82 (m, 1H);  $^{13}\text{C}$  NMR ( $\text{CDCl}_3$ , 75 MHz)  $\delta$  174.7 (C), 173.0 (C), 147.3 (C), 139.6 (C), 139.5 (C), 127.0 (CH), 121.3 (CH), 111.8 ( $\text{CH}_2$ ), 71.3 (C), 52.1 ( $\text{CH}_3$ ), 51.7 ( $\text{CH}_3$ ), 48.2 (CH), 44.9 (CH), 43.5 (CH), 39.1 ( $\text{CH}_2$ ), 38.5 (CH), 38.0 (CH), 25.4 ( $\text{CH}_2$ ),

24.2 (CH<sub>2</sub>), 24.1 (CH<sub>2</sub>), 22.1 (CH<sub>2</sub> x 2), 21.5 (CH<sub>2</sub>); HRMS (EI) m/z calcd for C<sub>23</sub>H<sub>30</sub>O<sub>5</sub> (M<sup>+</sup>) 386.2093, found 386.2071.

### 7-Methyl-13-oxa-tricyclo[7.4.1.0<sup>11,14</sup>]tetradeca-1(14),6,11-triene (24)

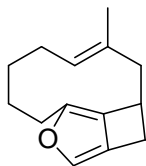

To a solution of **7** (51.5 mg, 0.255 mmol) in toluene (12 mL) in a microwave cell was added Et<sub>3</sub>N (0.355 mL, 2.55 mmol). The solution was degassed with argon (30 minutes) and subsequently heated with microwaves at 200 °C for 35 minutes. The solution was concentrated and once it was cooled to room temperature, it was put under the pump (very important as the compound is somewhat volatile). Purification by flash chromatography (5 % ethyl acetate/ 95 % hexanes) gave the tandem product **8** (yield not calculated since it is unstable on silica gel) along with the tricyclic compound **24** (13.9 mg, 27% yield) and tricyclic compound **25** (2.2 mg, 4 % yield).

**24** : IR (neat, cm<sup>-1</sup>) 2928 (s), 2856 (m), 1570 (w), 1436 (m), 1222 (w), 976 (w), 727 (w); <sup>1</sup>H NMR (CDCl<sub>3</sub>, 400 MHz) δ 6.88 (s, 1H), 4.99 (t, J=7.5 Hz, 1H), 3.72-3.66 (m, 1H), 3.25 (ddd, J=13.7, 5.7, 1.2 Hz, 1H), 2.66 (ddd, J=13.7, 3.1, 1.1 Hz, 1H), 2.62-2.49 (m, 3H), 2.03-1.87 (m, 4H), 1.82-1.73 (m, 1H), 1.69 (s, 3H), 1.41-1.32 (m, 1H), 1.11-1.01 (m, 1H); <sup>13</sup>C NMR (CDCl<sub>3</sub>, 100 MHz) δ 146.7 (C), 133.9 (C), 129.6 (CH), 128.7 (CH), 124.8 (C), 124.5 (C), 45.0 (CH<sub>2</sub>), 41.2 (CH), 32.1 (CH<sub>2</sub>), 28.7 (CH<sub>2</sub>), 28.5 (CH<sub>2</sub>), 26.7 (CH<sub>2</sub>), 22.6 (CH<sub>2</sub>), 16.3 (CH<sub>3</sub>); HRMS (EI) m/z calcd for C<sub>14</sub>H<sub>17</sub>O (M-H)<sup>+</sup> 201.1274, found 201.1275.

### 2,4-Dimethylene-2a,3,4,4a,5,6,7,8-octahydro-2H-cyclobuta[a]naphthalen-8a-ol (25)

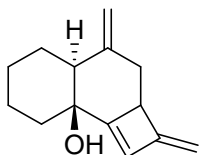

IR (neat, cm<sup>-1</sup>) 3462 (br), 3079 (w), 2932 (s), 2854 (m), 1718 (w), 1667 (w), 1446 (w), 1276 (w), 890 (w); <sup>1</sup>H NMR (CDCl<sub>3</sub>, 500 MHz) δ 5.93 (s, 1H), 5.00 (d, J=1.6 Hz, 1H), 4.75 (d, J=1.0 Hz, 1H), 4.60 (d, J=1.2 Hz, 1H), 4.50 (s, 1H), 3.12 (dd, J=10.4, 6.7 Hz, 1H), 2.68 (dd, J=12.4, 6.8 Hz, 1H), 2.05-1.96 (m, 4H), 1.83-1.79 (m, 1H), 1.71-1.56 (m, 6H); <sup>13</sup>C NMR (CDCl<sub>3</sub>, 125 MHz) δ 161.3 (C), 150.3 (C), 147.6 (C), 123.3 (CH), 110.9 (CH<sub>2</sub>), 97.2 (CH<sub>2</sub>), 70.1 (C), 51.3 (CH), 46.3 (CH), 41.3 (CH<sub>2</sub>), 31.2 (CH<sub>2</sub>), 25.7 (CH<sub>2</sub>), 23.4 (CH<sub>2</sub>), 20.6 (CH<sub>2</sub>); HRMS (EI) m/z calcd for C<sub>14</sub>H<sub>18</sub>O (M)<sup>+</sup> 202.1358, found 202.1358.

The proposed mechanism for **24** :

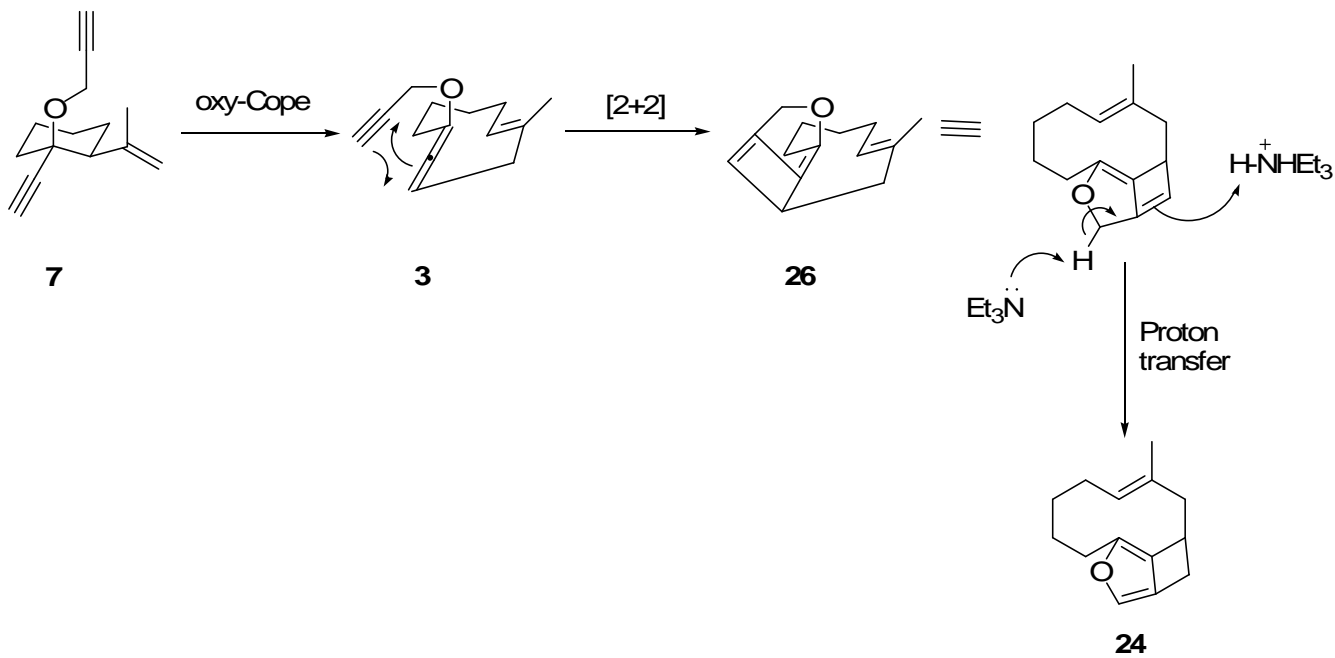

The proposed mechanism for **25**:

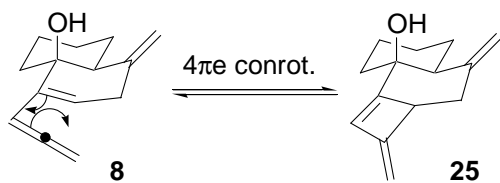

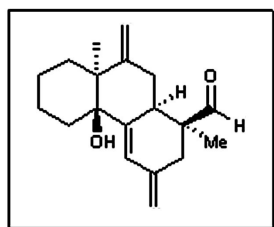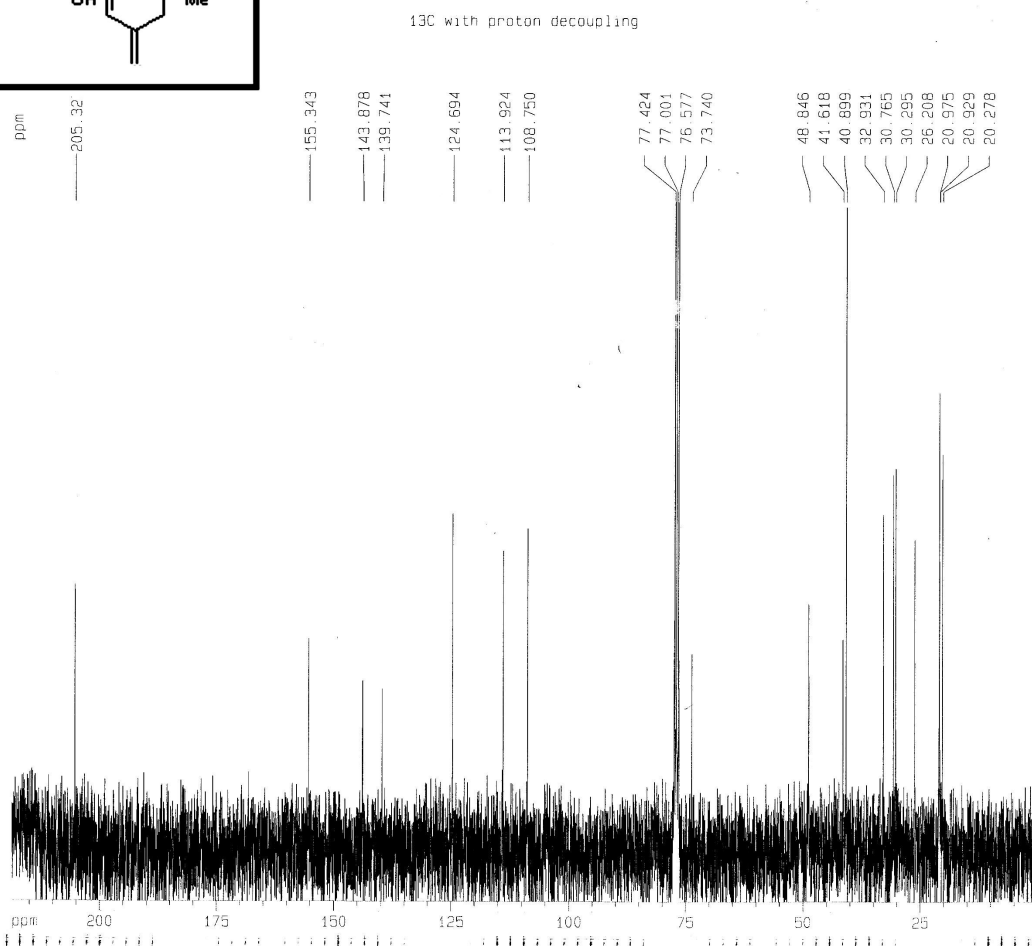

Current Data Parameters  
NAME rc\_666p  
EXPNO 2  
PROCNO 1

F2 - Acquisition Parameters  
Date\_ 20040317  
Time 14.41  
INSTRUM av300  
PROBHD 5 mm GNP 1H/1  
PULPROG zgpg30  
TD 32768  
SOLVENT CDCl3  
NS 252  
DS 0  
SWH 17985.611 Hz  
FIDRES 0.548877 Hz  
AQ 0.9110004 sec  
RG 5160.6  
DW 27.800 usec  
DE 6.00 usec  
TE 300.0 K  
D1 1.00000000 sec  
d11 0.03000000 sec  
d12 0.00002000 sec

----- CHANNEL f1 -----  
NUC1 13C  
P1 5.00 usec  
PL1 -6.00 dB  
SF01 75.4752653 MHz

----- CHANNEL f2 -----  
CPOPRG2 waltz16  
NUC2 1H  
PCPD2 70.00 usec  
PL2 -3.00 dB  
PL12 13.48 dB  
PL13 15.63 dB  
SF02 300.1314860 MHz

F2 - Processing parameters  
S1 65536  
SF 75.4677481 MHz  
WDW EM  
SSB 0  
LB 1.00 Hz  
GB 0  
PC 1.40

1D NMR plot parameters  
CX 20.00 cm  
CY 12.50 cm  
F1P 220.000 ppm  
F1 16602.90 Hz  
F2P 0.000 ppm  
F2 0.00 Hz  
PRMCM 11.00000 ppm/cm  
HZCM 830.14520 Hz/cm

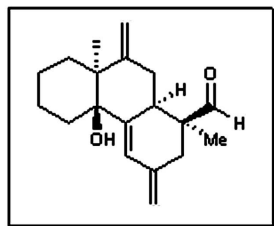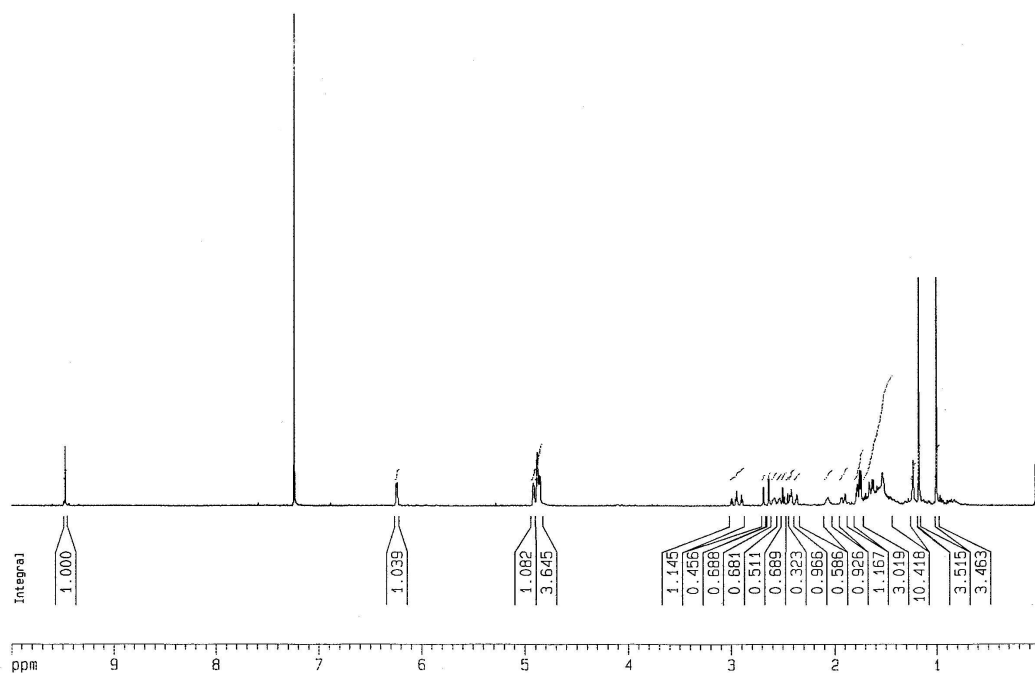

Current Data Parameters  
NAME rc\_668pb  
EXPNO 1  
PROCNO 1

F2 - Acquisition Parameters  
Date\_ 20040401  
Time 9.49  
INSTRUM av300  
PROBHD 5 mm QNP 1H/1  
PULPROG zg30  
TD 30720  
SOLVENT CDCl3  
NS 32  
DS 0  
SWH 5081.301 Hz  
FIDRES 0.165407 Hz  
AQ 3.0228980 sec  
RG 912.3  
DW 98.400 usec  
DE 6.00 usec  
TE 300.0 K  
D1 1.00000000 sec

===== CHANNEL f1 =====  
NUC1 1H  
P1 10.50 usec  
PL1 -3.00 dB  
SF01 300.1319477 MHz

F2 - Processing parameters  
SI 65536  
SF 300.1300000 MHz  
WDW EM  
SSB 0  
LB 0.10 Hz  
GB 0  
PC 1.00

1D NMR plot parameters  
CX 20.00 cm  
CY 10.00 cm  
F1P 10.000 ppm  
F1 3001.30 Hz  
F2P 0.000 ppm  
F2 0.00 Hz  
PPMCM 0.50000 ppm/cm  
HZCM 150.06500 Hz/cm

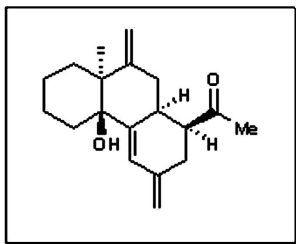

<sup>13</sup>C with proton decoupling

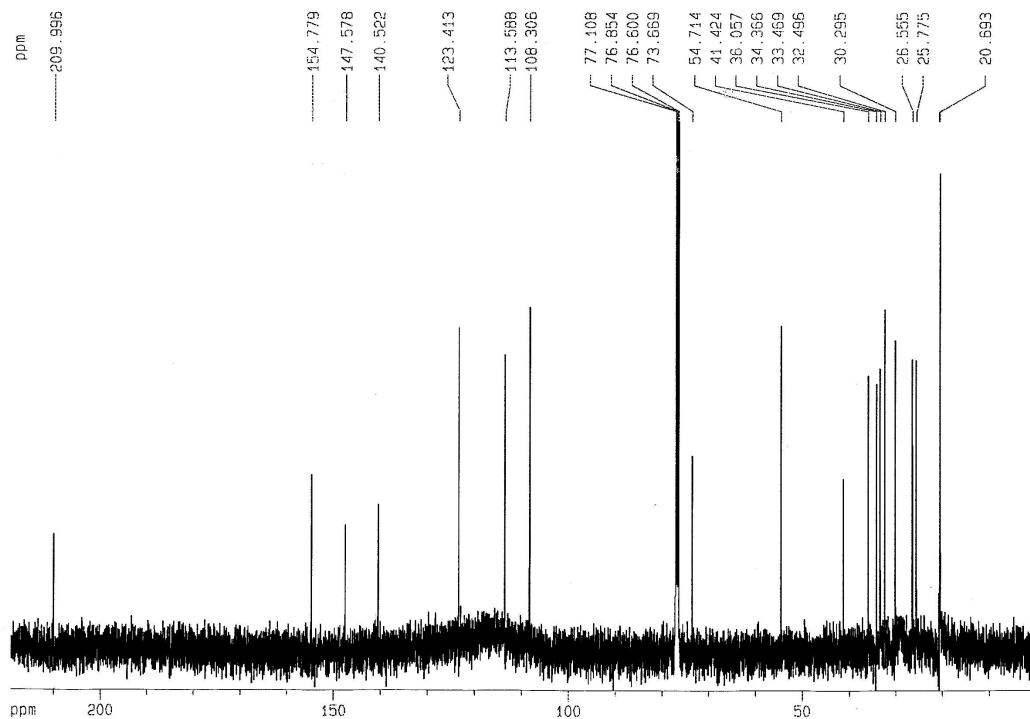

```

Current Data Parameters
NAME      rc_670c13
EXPNO     1
PROCNO    1

F2 - Acquisition Parameters
Date_     20040331
Time      15.27
INSTRUM   AV500WB
PROBHD    5 mm BBI 1H-BB
PULPROG   zgpg30
TD         65536
SOLVENT   CDCl3
NS         2661
DS         0
SMH       30030.029 Hz
FIDRES    0.458222 Hz
AQ         1.0912244 sec
RG         3251
DW         16.650 usec
DE         6.00 usec
TE         300.0 K
D1         1.00000000 sec
d11        0.03000000 sec
d12        0.00002000 sec

===== CHANNEL f1 =====
NUC1       13C
P1         14.50 usec
PL1        -3.00 dB
SFO1       125.7703643 MHz

===== CHANNEL f2 =====
CPDPRG2    waltz16
NUC2       1H
PCPD2      80.00 usec
PL2         3.00 dB
PL12        20.64 dB
PL13        23.56 dB
SFO2       500.1320005 MHz

F2 - Processing parameters
SI         32768
SF         125.7578051 MHz
WDW        EM
SSB         0
LB         1.00 Hz
GB         0
PC         1.00

1D NMR plot parameters
CX         20.00 cm
CY         80.00 cm
F1P        220.000 ppm
F1         27666.72 Hz
F2P        0.000 ppm
F2         0.00 Hz
PPMCM      11.00000 ppm/cm
HZCM       1383.33582 Hz/cm
    
```

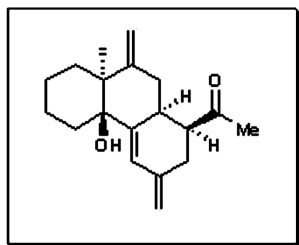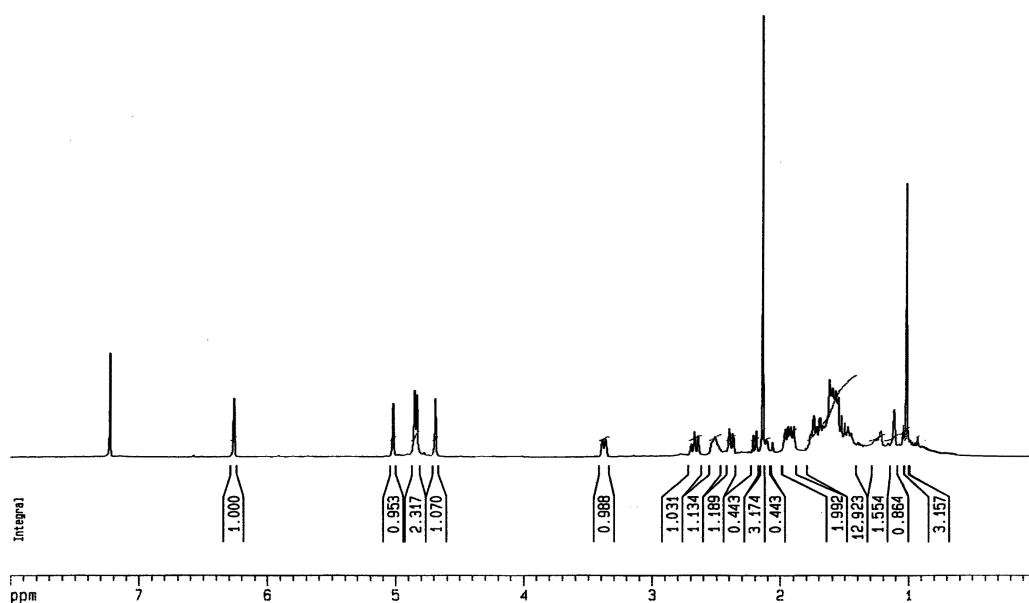

Current Data Parameters  
NAME rc\_670p1  
EXPNO 1  
PROCNO 1

F2 - Acquisition Parameters  
Date\_ 20040322  
Time 9.24  
INSTRUM AV500MB  
PROBHD 5 mm BBI 1H-BB  
PULPROG zg30  
TD 65536  
SOLVENT Acetone  
NS 32  
DS 0  
SWH 7440.476 Hz  
FIDRES 0.113533 Hz  
AQ 4.4040694 sec  
RG 45.25  
DM 67.200 usec  
DE 6.00 usec  
TE 300.0 K  
D1 0.01000000 sec

\*\*\*\*\* CHANNEL f1 \*\*\*\*\*  
NUC1 1H  
P1 10.50 usec  
PL1 3.00 dB  
SFO1 500.132766 MHz

F2 - Processing parameters  
SI 65536  
SF 500.1300049 MHz  
WDW EM  
SSB 0  
LB 0.00 Hz  
GB 0  
PC 1.00

1D NMR plot parameters  
CX 20.00 cm  
CY 10.00 cm  
F1P 8.000 ppm  
F1 4001.04 Hz  
F2P 0.000 ppm  
F2 0.00 Hz  
PPMCM 0.40000 ppm/cm  
HZCM 200.05200 Hz/cm

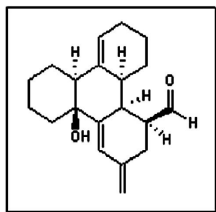

<sup>13</sup>C with proton decoupling

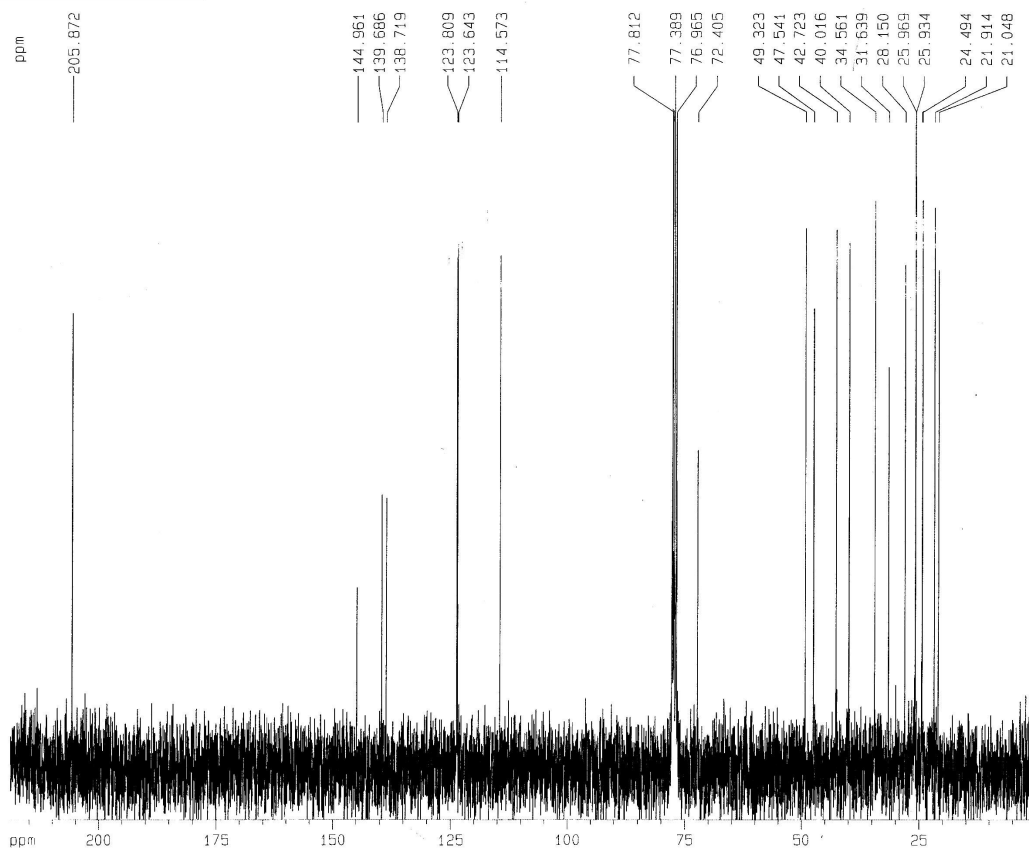

Current Data Parameters  
 NAME rc\_651p  
 EXPNO 2  
 PROCNO 1

F2 - Acquisition Parameters  
 Date\_ 20040302  
 Time 16:51  
 INSTRUM sv300  
 PROBHD 5 mm QNP 1H/1  
 PULPROG zgpg30  
 TD 32768  
 SOLVENT CDCl3  
 NS 561  
 DS 0  
 SWH 17985.611 Hz  
 FIDRES 0.548877 Hz  
 AQ 0.9110004 sec  
 RG 2298.8  
 DW 27.800 usec  
 DE 5.00 usec  
 TE 300.0 K  
 D1 1.0000000 sec  
 d11 0.0300000 sec  
 d12 0.0002000 sec

===== CHANNEL f1 =====  
 NUC1 <sup>13</sup>C  
 P1 5.00 usec  
 PL1 -6.00 dB  
 SF01 75.4752653 MHz

===== CHANNEL f2 =====  
 CPDPRG2 waltz16  
 NUC2 <sup>1</sup>H  
 PCPD2 70.00 usec  
 RL2 -3.00 dB  
 RL12 13.48 dB  
 RL13 15.63 dB  
 SF02 300.1314860 MHz

F2 - Processing parameters  
 SI 65536  
 SF 75.4677190 MHz  
 KDW EM  
 SSB 0  
 LB 1.00 Hz  
 GB 0  
 PC 1.40

1D NMR plot parameters  
 CX 20.00 cm  
 CY 12.50 cm  
 F1P 220.000 ppm  
 F1 16602.90 Hz  
 F2P 0.000 ppm  
 F2 0.00 Hz  
 PRMCM 11.00000 ppm/cm  
 HZCM 830.14490 Hz/cm



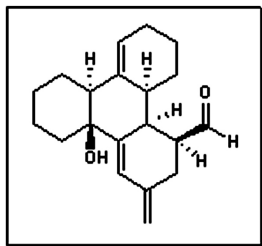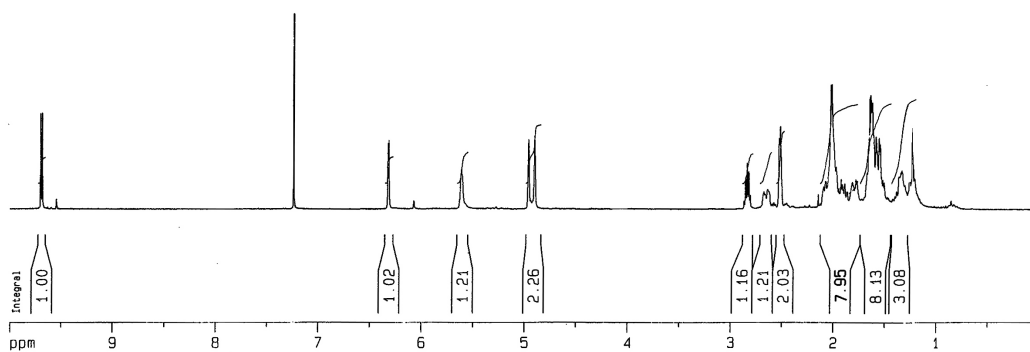

Current Data Parameters  
NAME rc\_651\_b  
EXPNO 1  
PROCNO 1

F2 - Acquisition Parameters  
Date\_ 20040301  
Time 11.28  
INSTRUM av300  
PROBHD 5 mm QNP 1H/1  
PULPROG zg30  
TD 30720  
SOLVENT CDCl3  
NS 16  
DS 0  
SWH 5081.301 Hz  
FIDRES 0.165407 Hz  
AQ 3.0228980 sec  
RG 287.4  
OW 98.400 usec  
DE 6.00 usec  
TE 300.0 K  
D1 1.00000000 sec

===== CHANNEL f1 =====  
NUC1 1H  
P1 10.50 usec  
PL1 -3.00 dB  
SF01 300.1319477 MHz

F2 - Processing parameters  
SI 65536  
SF 300.1300000 MHz  
WDW EM  
SSB 0  
LB 0.10 Hz  
GB 0  
PC 1.00

1D NMR plot parameters  
CX 20.00 cm  
CY 10.00 cm  
F1P 10.000 ppm  
F1 3001.30 Hz  
F2P 0.000 ppm  
F2 0.00 Hz  
PPMCM 0.50000 ppm/cm  
HZCM 150.06500 Hz/cm

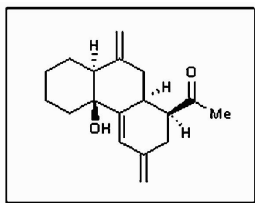

<sup>13</sup>C with proton decoupling

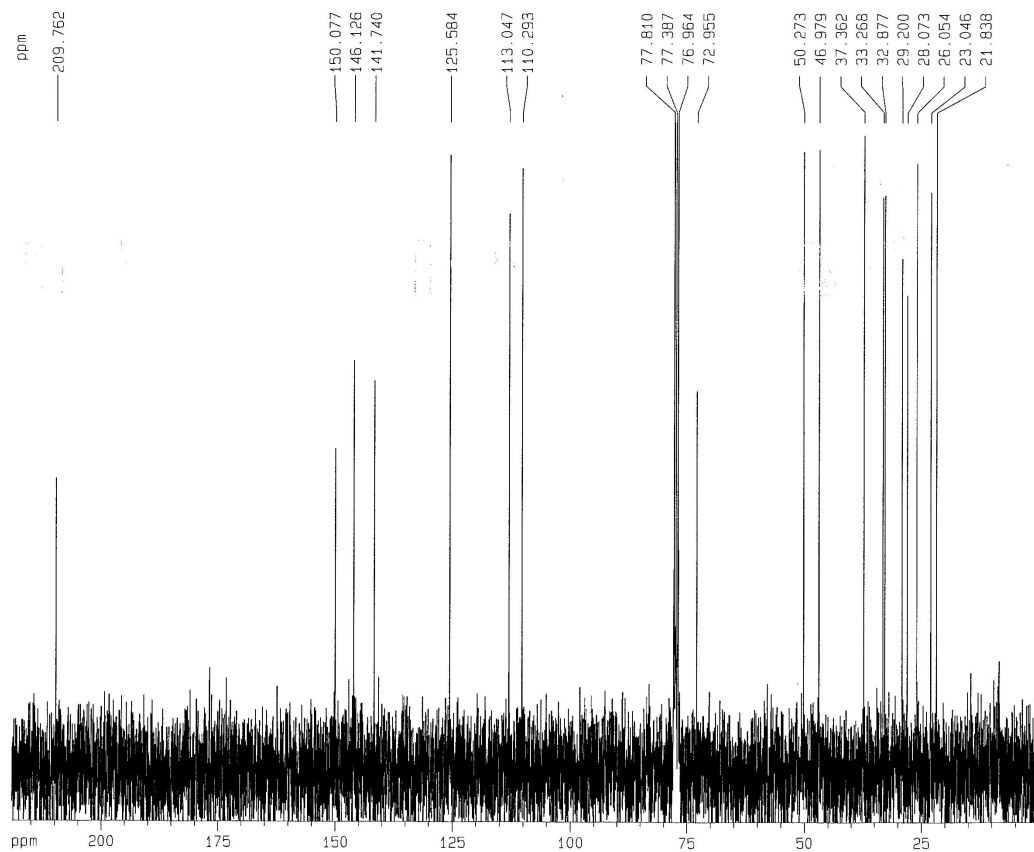

Current Data Parameters  
NAME rc\_505  
EXPNO 2  
PROCNO 1

F2 - Acquisition Parameters  
Date\_ 20031031  
Time 14.10  
INSTRUM av300  
PROBHD 5 mm GNP 1H/1  
PULPROG zgpg30  
TD 32768  
SOLVENT CDCl3  
NS 217  
DS 0  
SWH 17985.614 Hz  
FIDRES 0.548877 Hz  
AQ 0.9110004 sec  
RG 3649.1  
DW 27.800 usec  
DE 6.00 usec  
TE 300.0 K  
D1 1.00000000 sec  
d11 0.03000000 sec  
d12 0.00002000 sec

===== CHANNEL f1 =====  
NUC1 <sup>13</sup>C  
P1 5.00 usec  
PL1 -6.00 dB  
SF01 75.4752653 MHz

===== CHANNEL f2 =====  
CPDPRG2 waltz16  
NUC2 <sup>1</sup>H  
PCPD2 70.00 usec  
PL2 -3.00 dB  
PL12 13.48 dB  
PL13 15.53 dB  
SF02 300.1314860 MHz

F2 - Processing parameters  
SI 65536  
SF 75.4677190 MHz  
WDW EM  
SSB 0  
LB 1.00 Hz  
GB 0  
PC 1.40

1D NMR plot parameters  
CX 20.00 cm  
CY 12.50 cm  
F1P 220.000 ppm  
F1 16602.90 Hz  
F2P 0.000 ppm  
F2 0.00 Hz  
PPMCM 11.00000 ppm/cm  
HZCM 830.14490 Hz/cm

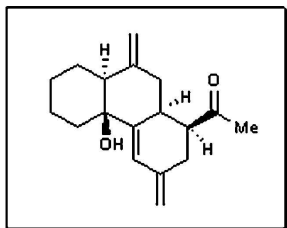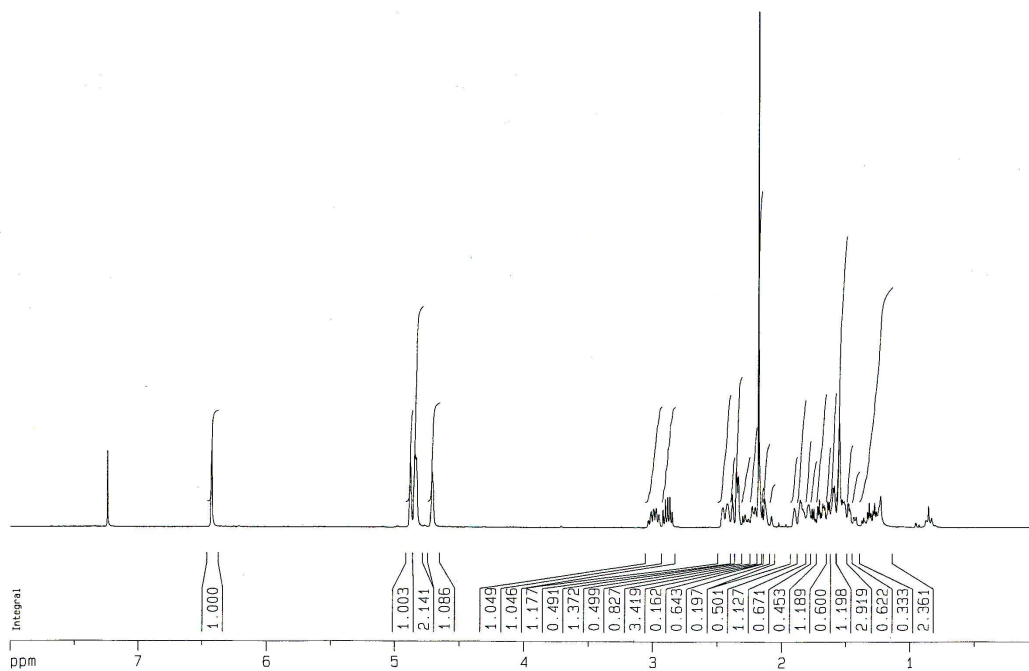

Current Data Parameters  
NAME rc\_505  
EXPNO 1  
PROCNO 1

F2 - Acquisition Parameters  
Date\_ 20031031  
Time 14.06  
INSTRUM av300  
PROBHD 5 mm QNP 1H/1  
PULPROG zg30  
TD 30720  
SOLVENT CDCl3  
NS 64  
DS 0  
SWH 5081.301 Hz  
FIDRES 0.165407 Hz  
AQ 3.0228980 sec  
RG 287.4  
DW 98.400 usec  
DE 6.00 usec  
TE 300.0 K  
D1 1.00000000 sec

===== CHANNEL f1 =====  
NUC1 1H  
P1 10.50 usec  
PL1 -3.00 dB  
SF01 300.1319477 MHz

F2 - Processing parameters  
SI 65536  
SF 300.1300000 MHz  
WDW EM  
SSB 0  
LB 0.10 Hz  
GB 0  
PC 1.00

1D NMR plot parameters  
CX 20.00 cm  
CY 10.00 cm  
F1P 8.000 ppm  
F1 2401.04 Hz  
F2P 0.000 ppm  
F2 0.00 Hz  
PPMCM 0.40000 ppm/cm  
HZCM 120.05200 Hz/cm

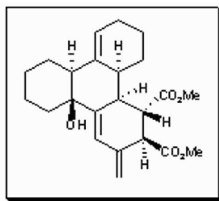

<sup>13</sup>C with proton decoupling

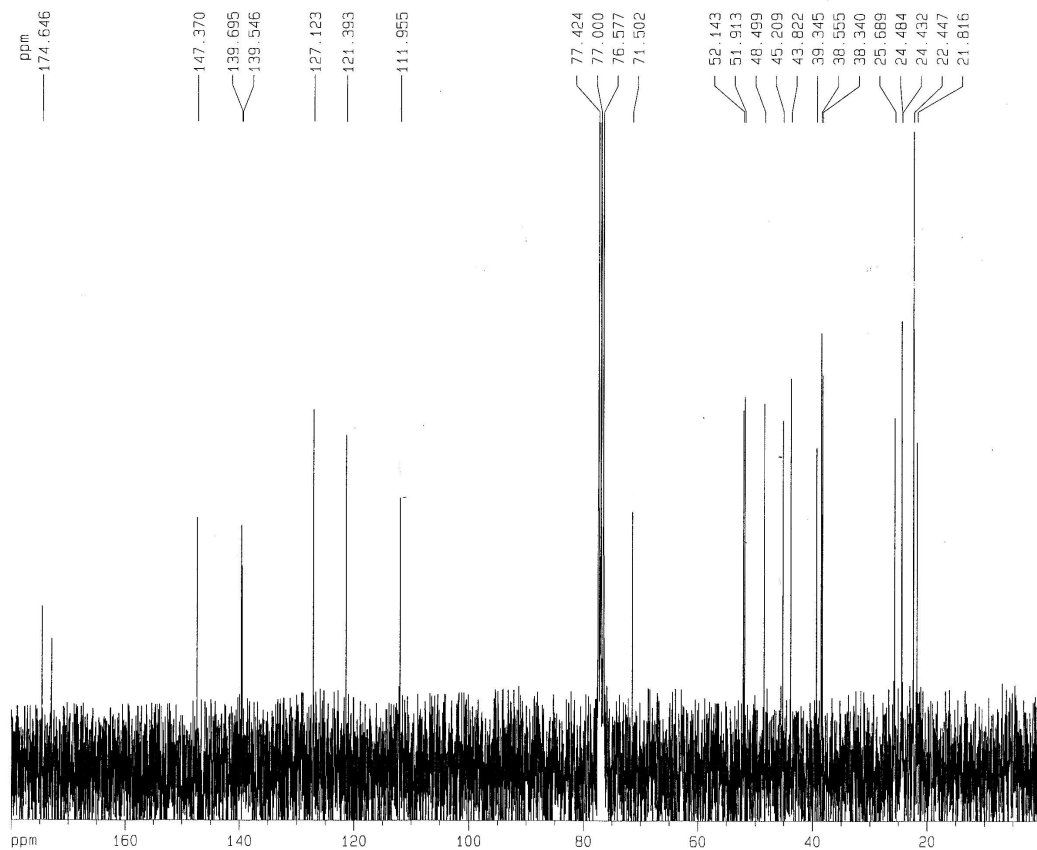

Current Data Parameters  
 NAME rc\_630\_2  
 EXPNO 1  
 PROCNO 1

F2 - Acquisition Parameters  
 Date\_ 20040211  
 Time 16.23  
 INSTRUM av300  
 PROBHD 5 mm QNP 1H/1  
 PULPROG zgpg30  
 TO 32768  
 SOLVENT CDCl3  
 NS 256  
 DS 0  
 SWH 17985.611 Hz  
 FIDRES 0.548877 Hz  
 AQ 0.9110004 sec  
 RG 3251  
 DW 27.800 usec  
 DE 6.00 usec  
 TE 300.0 K  
 D1 1.0000000 sec  
 d11 0.0300000 sec  
 d12 0.0002000 sec

----- CHANNEL f1 -----  
 NUC1 <sup>13</sup>C  
 P1 5.00 usec  
 PL1 -6.00 dB  
 SF01 75.4752653 MHz

----- CHANNEL f2 -----  
 CPDPRG2 waltz16  
 NUC2 <sup>1</sup>H  
 PCPD2 70.00 usec  
 PL2 -3.00 dB  
 PL12 13.48 dB  
 PL13 15.63 dB  
 SF02 300.1314660 MHz

F2 - Processing parameters  
 SI 65536  
 SF 75.4677478 MHz  
 NDM EM  
 SSB 0  
 LB 1.00 Hz  
 GB 0  
 PC 1.40

1D NMR plot parameters  
 CX 20.00 cm  
 CY 12.50 cm  
 F1P 180.000 ppm  
 F1 139584.20 Hz  
 F2P 0.000 ppm  
 F2 0.00 Hz  
 PPMCM 9.00000 ppm/cm  
 HZCM 679.20978 Hz/cm

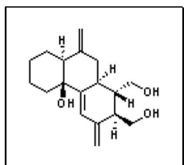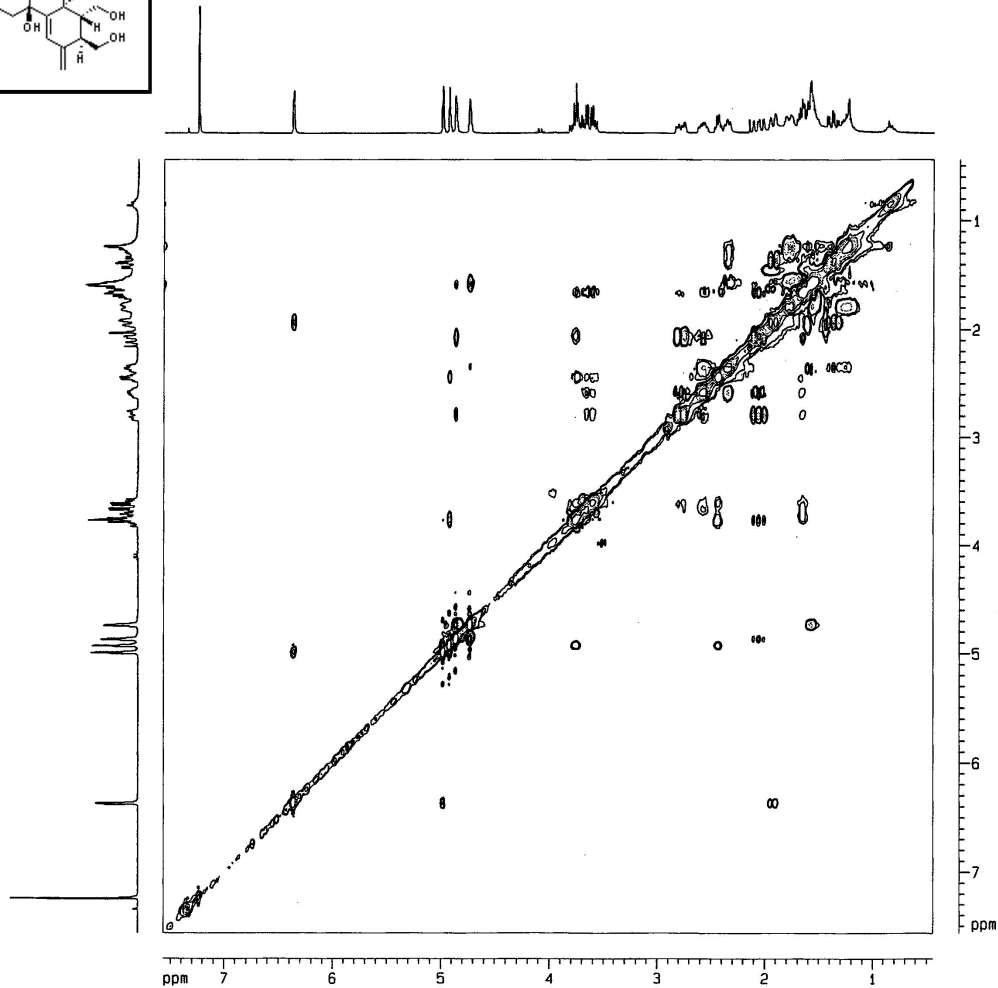

1H NOESY

```

Current Data Parameters
NAME      rc_254_26
EXPNO    3
PROCNO   1

F2 - Acquisition Parameters
Date_    20050203
Time     0.42
INSTRUM  av300
PROBHD   5 mm QNP 1H/1
PULPROG  zgpg30
TD        65536
SOLVENT  CDCl3
NS        8
DS        4
SWH       2140.411 Hz
FIDRES    2.000040 Hz
AQ        0.7382564 sec
RG         768.2
DM        233.500 usec
DE         6.00 usec
TE        300.2 K

===== CHANNEL f1 =====
NUC1      1H
P1        12.00 usec
PC        21.00 usec
PL1       -3.00 dB
SFO1      300.13627 MHz

===== GRADIENT CHANNEL =====
GPMW1     sine:100
GPMW2     sine:100
GPMW3     sine:100
OP1       0.00 s
OP2       0.00 s
OP3       0.00 s
OP4       0.00 s
OP5       0.00 s
OP6       0.00 s
OP7       30.00 s
OP8       30.00 s
OP9       30.00 s
OP10      1000.00 usec

F1 - Acquisition parameters
WDW       1
SSB        0
GFB        0
SF         300.13627 MHz
WDW        1
SSB         0
GFB         0
SF         300.13627 MHz

F2 - Processing parameters
SI         65536
SF         300.13627 MHz
WDW        1
SSB         0
GFB         0
SF         300.13627 MHz

F1 - Processing parameters
SI         65536
SF         300.13627 MHz
WDW        1
SSB         0
GFB         0
SF         300.13627 MHz

2D NMR plot parameters
C12       15.00 cm
C11       15.00 cm
F1P1L3    7.570 ppm
F1P1L2    2071.81 Hz
F1P1L1    0.438 ppm
F1P1L0    131.50 Hz
F1P1L3    7.570 ppm
F1P1L2    2071.81 Hz
F1P1L1    0.438 ppm
F1P1L0    131.50 Hz
F1P1P3    0.47844 ppm/cm
F1P1P2    143.80466 Hz/cm
F1P1P1    0.47844 ppm/cm
    
```

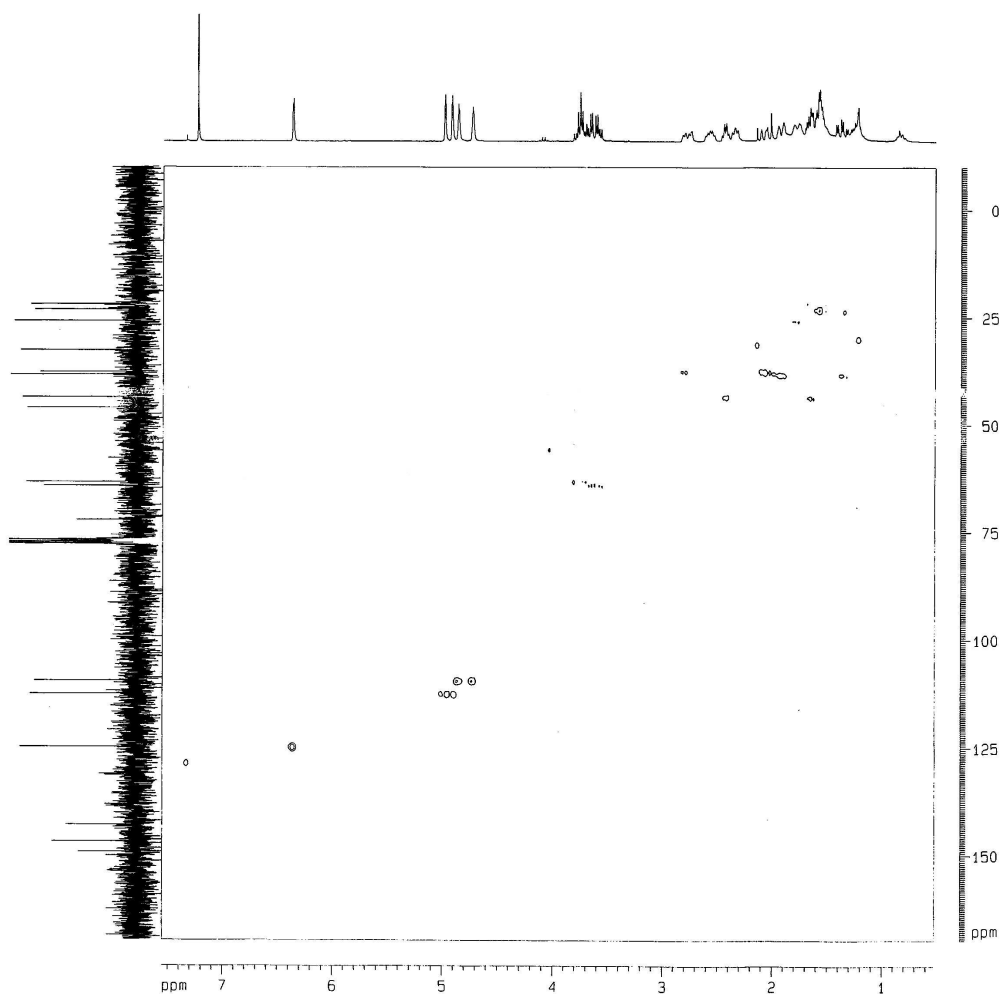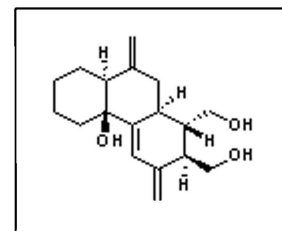

```

SC      8.00 usec
TE      300.0 K
CHM12  145.000000 sec
G1      0.00000000 sec
G2      1.00000000 sec
G12     0.00160000 sec
G13     0.00000000 sec
G16     0.00000000 sec
G18     0.00000000 sec
IN0     0.00000000 sec
IN0E1   0.00000000 sec
MCM1    1.00000000 sec

***** CHANNEL f1 *****
NUC1     13C
P1       15.00 usec
P2       21.00 usec
PL1      23.00 dB
SFO1     300.1312123 MHz

***** CHANNEL f2 *****
CPROG2   13C
NUC2     13C
PORG2    5.00 usec
PORG2    70.00 usec
PL2      -6.00 dB
PL12     16.52 dB
SFO2     75.4737564 MHz

***** CHANNEL CHANNEL *****
CPROG1   13C
NUC1     13C
PORG1    5.00 usec
PORG1    70.00 usec
PL1      -6.00 dB
PL12     16.52 dB
SFO1     300.1312123 MHz

***** Acquisition parameters *****
NOI      2
TD       256
SFO1     75.4737564 MHz
FIDRES   53.014417 Hz
SI       184.032 bits

***** Processing parameters *****
SI       512
SF       300.1300000 MHz
SOLV     0
SOLV     0
LB       0.00 Hz
GB       0
PC       1.00

***** Processing parameters *****
SI       512
NUC2     13C
SF       75.4737564 MHz
SOLV     0
SOLV     0
LB       0.00 Hz
GB       0

***** 2D NMR plot parameters *****
CX2     12.00 cm
CX1     15.00 cm
FOLD    7.000 bits
FOL2    2000.01 Hz
FOL3    0.000 bits
FOL4    100.00 Hz
FOL5    170.010 bits
FOL6    12000.00 Hz
FOL7    -10.010 bits
FOL8    750.00 Hz
FOL9    0.00000000 cm/cx
FOL10   140.26570 Hz/cx
FOL11   12.00000 cm/cx
FOL12   905.70712 Hz/cx
    
```

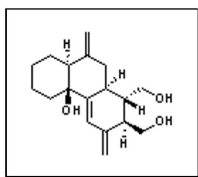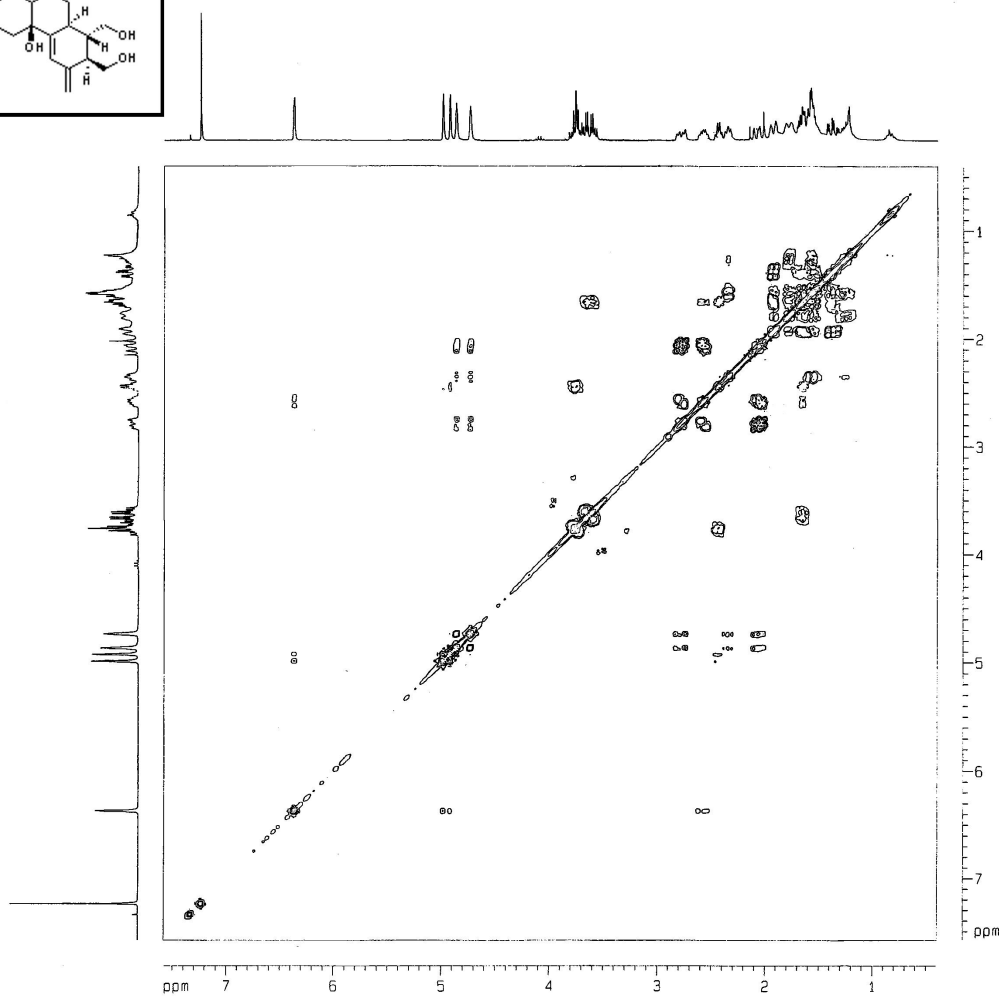

1H COSY

Current Data Parameters  
 NAME n2\_434120  
 EXPNO 4  
 PROCNO 1

F2 - Acquisition Parameters  
 Date\_ 20030922  
 Time 21:54  
 INSTRUM av300  
 PROBHD 5 mm QNP 1H/1  
 PULPROG cosy45genf  
 TD 1024  
 SOLVENT CDCl3  
 NS 1  
 DS 0  
 SWH 2155.172 Hz  
 FIDRES 2.104681 Hz  
 AQ 0.2376189 sec  
 RG 500.3  
 DM 232.000 usec  
 DE 0.00 usec  
 TE 300.0 K  
 D0 0.0000000 sec  
 C1 1.0000000 sec  
 d13 0.00000400 sec  
 D16 0.00010000 sec  
 IM0 0.00000000 sec  
 MCREST 0.00000000 sec  
 MCNCR 1.00000000 sec

\*\*\*\*\* CHANNEL f1 \*\*\*\*\*  
 NUC1 1H  
 P0 5.25 usec  
 P1 10.50 usec  
 PL1 -1.00 dB  
 SFO1 300.1311982 MHz

\*\*\*\*\* GRADIENT CHANNEL \*\*\*\*\*  
 GPMAX1 sine 100  
 GPMAX2 sine 100  
 GPC1 0.00 %  
 GPC2 0.00 %  
 GPC3 0.00 %  
 GPC4 10.00 %  
 GPC5 10.00 %  
 P16 1000.00 usec

F1 - Acquisition parameters  
 MD 1  
 TD 256  
 SFO1 300.1312 MHz  
 FIDRES 8.418642 Hz  
 SW 7.161 ppm

F2 - Processing parameters  
 SI 1024  
 SF 300.1300000 MHz  
 WDW SINC  
 SSB 0  
 LB 0.00 Hz  
 GB 0  
 PC 1.00

F1 - Processing parameters  
 SI 1024  
 MC2 0  
 SF 300.1300000 MHz  
 WDW SINC  
 SSB 0  
 LB 0.00 Hz  
 GB 0

2D NMR plot parameters  
 C12 15.00 cm  
 C11 15.00 cm  
 FFPLO 7.583 ppm  
 F2LO 2275.77 Hz  
 F3PHI 0.482 ppm  
 FPHI 120.60 Hz  
 F1FLO 7.583 ppm  
 F1LO 2275.77 Hz  
 F1PHI 0.482 ppm  
 F1HI 120.60 Hz  
 F3PPHCH 0.47872 ppm/cm  
 F2NCH 143.67816 Hz/cm  
 F1PPHCH 0.47872 ppm/cm  
 F1NCH 143.67816 Hz/cm

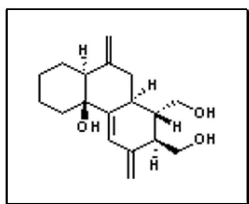

<sup>13</sup>C with proton decoupling

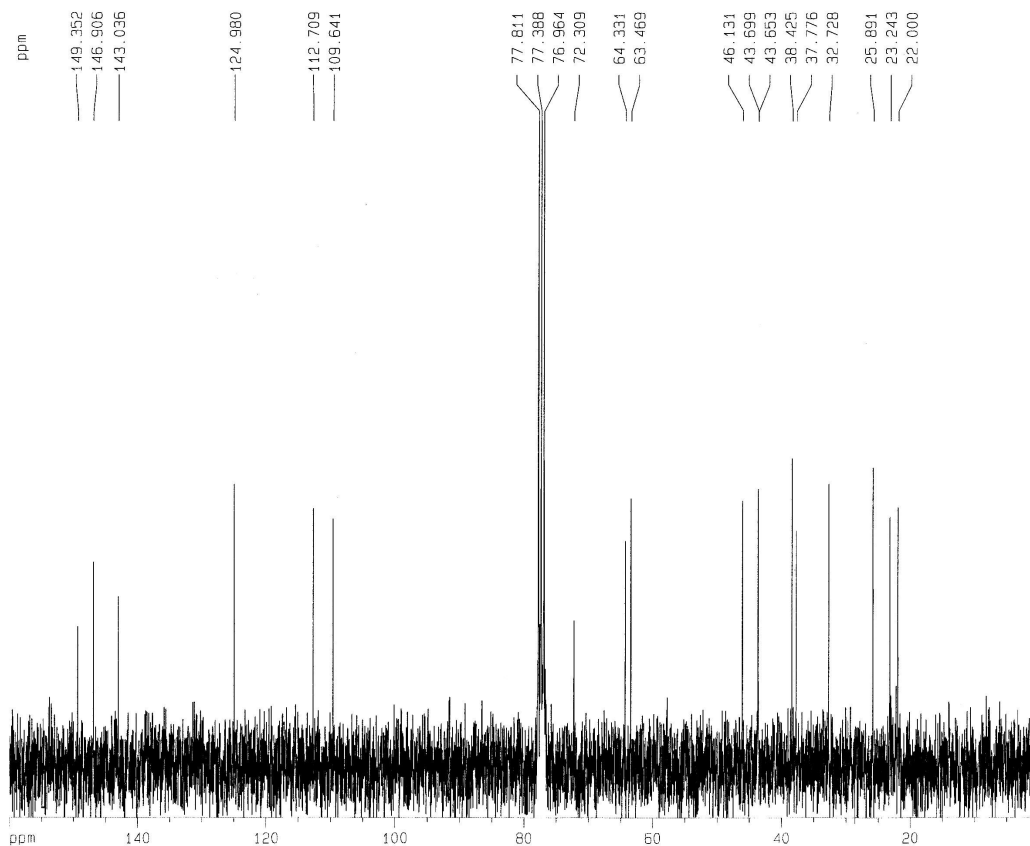

Current Data Parameters  
 NAME rc\_434  
 EXPNO 2  
 PROCNO 1  
 F2 - Acquisition Parameters  
 Date\_ 20030919  
 Time 16.02  
 INSTRUM av300  
 PROBHD 5 mm QNP 1H/1  
 PULPROG zgpg30  
 TD 32768  
 SOLVENT CDCl3  
 NS 407  
 DS 0  
 SWH 17985.611 Hz  
 FIDRES 0.548877 Hz  
 AQ 0.9110004 sec  
 RG 3649.1  
 DW 27.800 usec  
 DE 6.00 usec  
 TE 300.0 K  
 D1 1.00000000 sec  
 d11 0.03000000 sec  
 d12 0.00002000 sec

----- CHANNEL f1 -----  
 NUC1 <sup>13</sup>C  
 P1 5.00 usec  
 PL1 -6.00 dB  
 SF01 75.4752653 MHz

----- CHANNEL f2 -----  
 CPROPRG2 waltz16  
 NUC2 <sup>1</sup>H  
 PCPD2 70.00 usec  
 PL2 -3.00 dB  
 PL12 13.48 dB  
 PL13 15.63 dB  
 SF02 300.1314860 MHz

F2 - Processing parameters  
 SI 65536  
 SF 75.4677190 MHz  
 WDW EM  
 SSB 0  
 LB 1.00 Hz  
 GB 0  
 PC 1.40

1D NMR plot parameters  
 CX 20.00 cm  
 CY 6.00 cm  
 F1P 160.000 ppm  
 F1 12074.83 Hz  
 F2P 0.000 ppm  
 F2 0.00 Hz  
 PPMCM 8.00000 ppm/cm  
 HZCM 603.74176 Hz/cm



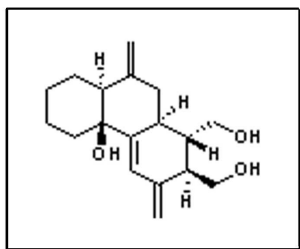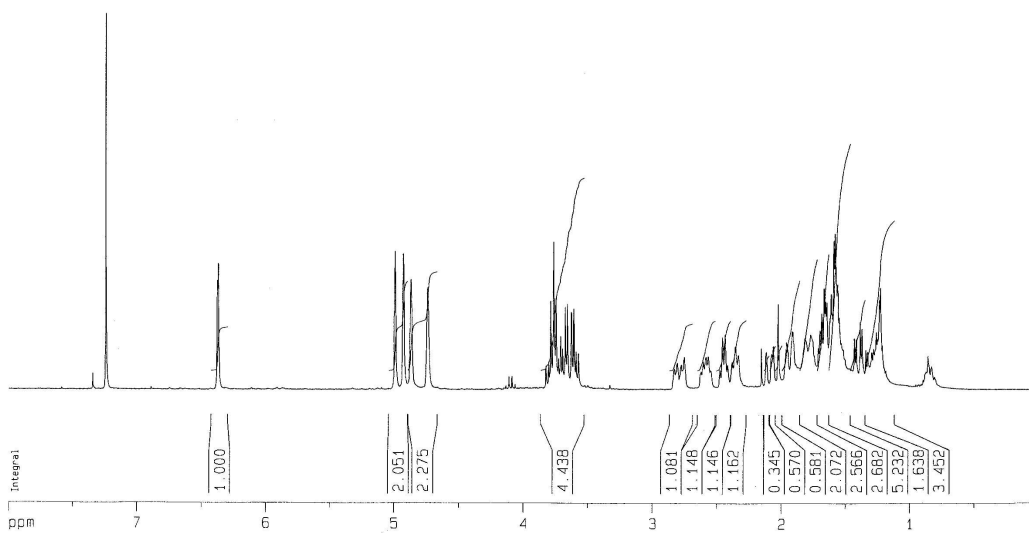

Current Data Parameters  
NAME rc\_434  
EXPNO 1  
PROCNO 1

F2 - Acquisition Parameters  
Date\_ 20030919  
Time 15.49  
INSTRUM av300  
PROBHD 5 mm QNP 1H/1  
PULPROG zg30  
TD 30720  
SOLVENT CDCl3  
NS 64  
DS 0  
SWH 5081.301 Hz  
FIDRES 0.165407 Hz  
AQ 3.0228980 sec  
RG 512  
DW 98.400 usec  
DE 6.00 usec  
TE 300.0 K  
D1 1.00000000 sec

\*\*\*\*\* CHANNEL f1 \*\*\*\*\*  
NUC1 1H  
P1 10.50 usec  
PL1 -3.00 dB  
SF01 300.1319477 MHz

F2 - Processing parameters  
SI 65536  
SF 300.1300000 MHz  
WDW EM  
SSB 0  
LB 0.10 Hz  
GB 0  
PC 1.00

1D NMR plot parameters  
CX 20.00 cm  
CY 10.00 cm  
F1P 8.000 ppm  
F1 2401.04 Hz  
F2P 0.000 ppm  
F2 0.00 Hz  
PPMCM 0.40000 ppm/cm  
HZCM 120.05200 Hz/cm

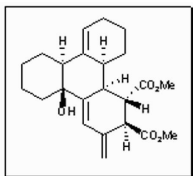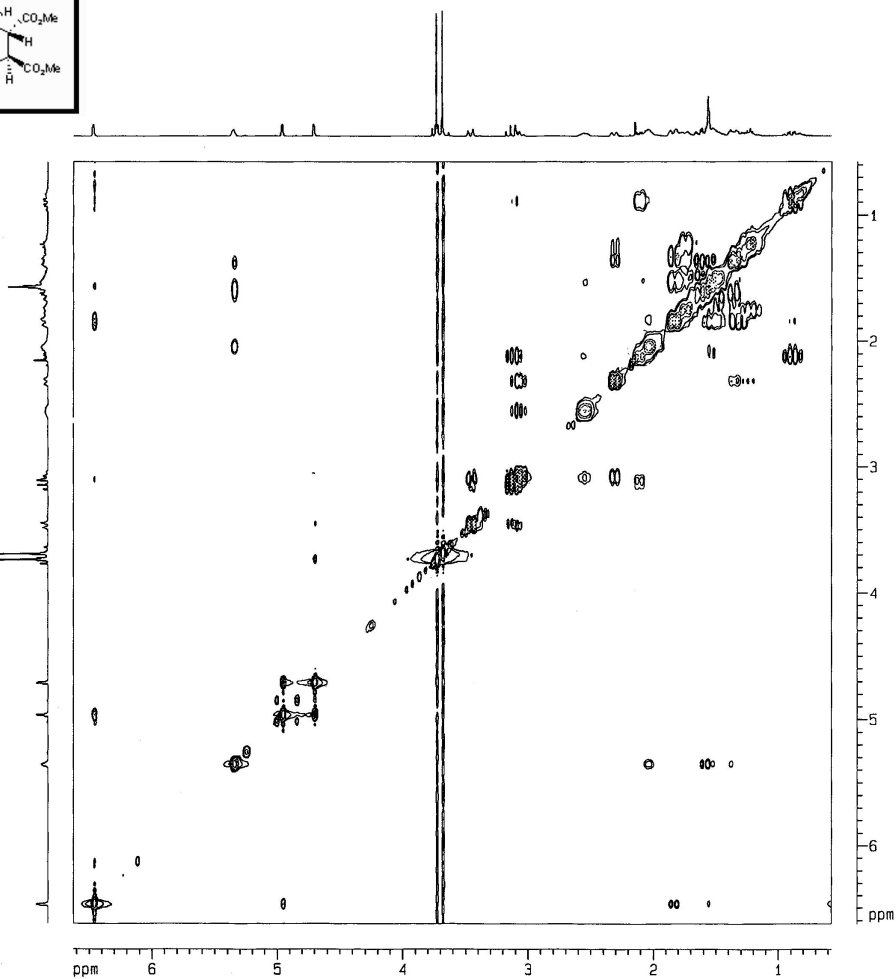

1H NOESY

```

Current Data Parameters
NAME      rc_530_26
EXPNO    4
PROCNO   1

F2 - Acquisition Parameters
Date_    20040611
Time     21.16
INSTRUM  av300
PROBHD   5 mm BBO 1H/1
PULPROG  megarpgp
ID       4024
SOLVENT  CDCl3
NS       34
DS       8
SWH      1816.860 Hz
FIDRES   1.774278 Hz
AQ       0.2818546 sec
RG        6130
DN       276.500 usec
DE       6.00 usec
TE       300.2
AQ       0.0000300 sec
DI       1.0000000 sec
DE       1.0000000 sec
d11      0.0300000 sec
d12      0.0010000 sec
DELTA    0.0811300 sec
DELTA1   0.0811300 sec
DWO      0.0005040 sec
MORPH    0.0000000 sec
MORPH2   0.0070000 sec
STOCH    128
TAU      0.9980000 sec

----- CHANNEL f1 -----
NUC1      1H
P1       16.50 usec
PD       21.00 usec
PL1      -3.00 dB
SFO1     300.131412 MHz

----- CHANNEL CHANNEL -----
GPMW1     size:100
GPMW2     size:100
GPMW3     size:100
OP11      0.00 %
OP12      0.00 %
OP13      0.00 %
OP14      0.00 %
OP15      0.00 %
OP16      30.00 %
OP17      50.00 %
OP18      30.00 %
PI6       1000.00 usec

F1 - Acquisition parameters
AQ       1
ID       1
SFO1     300.1311 MHz
FIDRES   7.181267 Hz
SI       6.054 ppm

F2 - Processing parameters
SI       6524
SF       300.1300000 MHz
WDW      EM
SSB       0
LB       0.00 Hz
GB       0
PC       1.00

F1 - Processing parameters
SI       6524
NCP      echo-antisymmetric
SF       300.1300000 MHz
WDW      EM
SSB       2
LB       0.00 Hz
GB       0

30 MHz plot parameters
C12      15.00 cm
DA       15.00 cm
FAPL0    6.620 ppm
FAPL1    1099.60 Hz
FAPL2    0.276 ppm
FAPL3    172.74 Hz
FAPL4    6.620 ppm
FAPL5    1099.60 Hz
FAPL6    0.276 ppm
FAPL7    172.74 Hz
FAPL8    6.620 ppm
FAPL9    1099.60 Hz
FAPL10   0.276 ppm
FAPL11   172.74 Hz
FAPL12   6.620 ppm
FAPL13   1099.60 Hz
FAPL14   0.276 ppm
FAPL15   172.74 Hz
FAPL16   6.620 ppm
FAPL17   1099.60 Hz
FAPL18   0.276 ppm
FAPL19   172.74 Hz
FAPL20   6.620 ppm
    
```

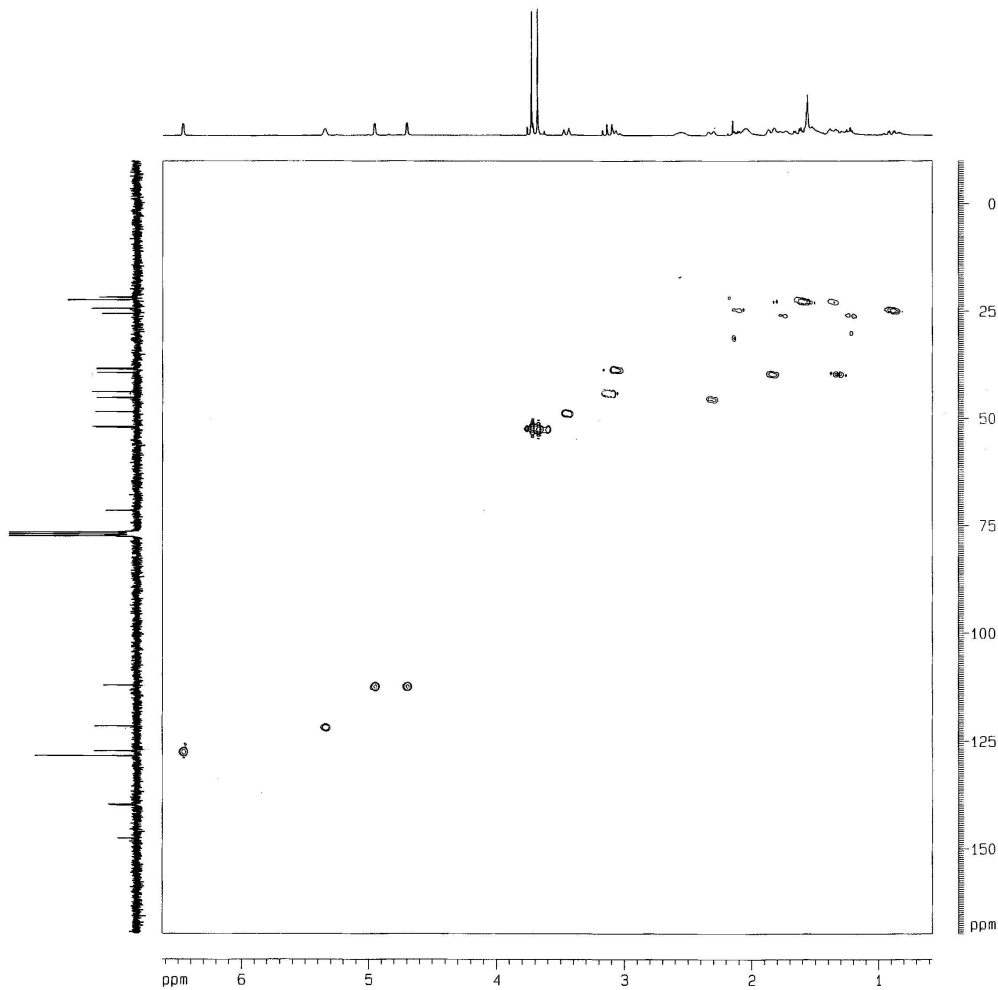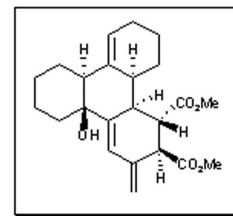

```

IU          1944
SOLVENT    CDCl3
SC          30
DS         1816.860 Hz
FIDRES     1.774798 Hz
AQ         0.2018048 sec
RG         13024
SM         272.200 usec
DE         6.00 usec
TE         300.2 K
CMT2       145.000000
SI         0.00000000 sec
SI         1.00000000 sec
AQ         0.00344800 sec
AQ         0.00000000 sec
AQ         0.00000000 sec
AQ         0.00242428 sec
AQ         0.00000000 sec
AQ         0.00000000 sec
AQ         0.00000000 sec
AQ         1.00000000 sec
***** CHANNEL f1 *****
NUC1        13C
P1          10.00 usec
AQ         21.00 usec
PL1        -1.00 dB
SFO1       300.1310812 MHz
***** CHANNEL f2 *****
CMT2002    50P2
NUC2        13C
P2          3.00 usec
AQ         78.00 usec
PL2        -6.00 dB
PL12       16.00 dB
SFO2       75.4737564 MHz
***** GRADIENT CHANNEL *****
GPMW1      51Hz 100
GPMW2      51Hz 100
GPMW3      51Hz 100
GPR1       0.00 %
GPR2       0.00 %
GPR3       0.00 %
GPR4       0.00 %
GPR5       0.00 %
GPR6       0.00 %
GPR7       0.00 %
GPR8       0.00 %
GPR9       0.00 %
GPR10      0.00 %
GPR11      0.00 %
GPR12      0.00 %
GPR13      0.00 %
GPR14      0.00 %
GPR15      0.00 %
GPR16      0.00 %
***** Acquisition parameters *****
RG          256
SFO1       75.473756 MHz
FIDRES     53.874847 Hz
SM         185.000 usec
***** F2 - Processing parameters *****
SI         512
SF         300.1300000 MHz
WDW        EMSC
SSB         0
LB          0.00 Hz
GB          0
PC          1.00
***** F1 - Processing parameters *****
SI         512
NUC1       13C
SF         75.4677190 MHz
WDW        SINC
SSB         0
LB          0.00 Hz
GB          0
***** 2D NMR plot parameters *****
CZ1        15.00 cm
CZ2        15.00 cm
F2PL1     15.420 usec
F2PL2     1589.00 Hz
F2PL3     15.570 usec
F2PL4     152.74 Hz
F2PL5     170.000 usec
F2PL6     15830.00 Hz
F2PL7     -15.000 usec
F2PL8     -756.00 Hz
F2PL9     0.46257 usec/cm
F2PL10    121.12403 usec/cm
F2PL11    12.00244 usec/cm
F2PL12    860.79114 usec/cm
    
```

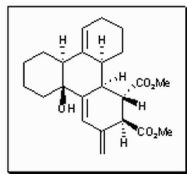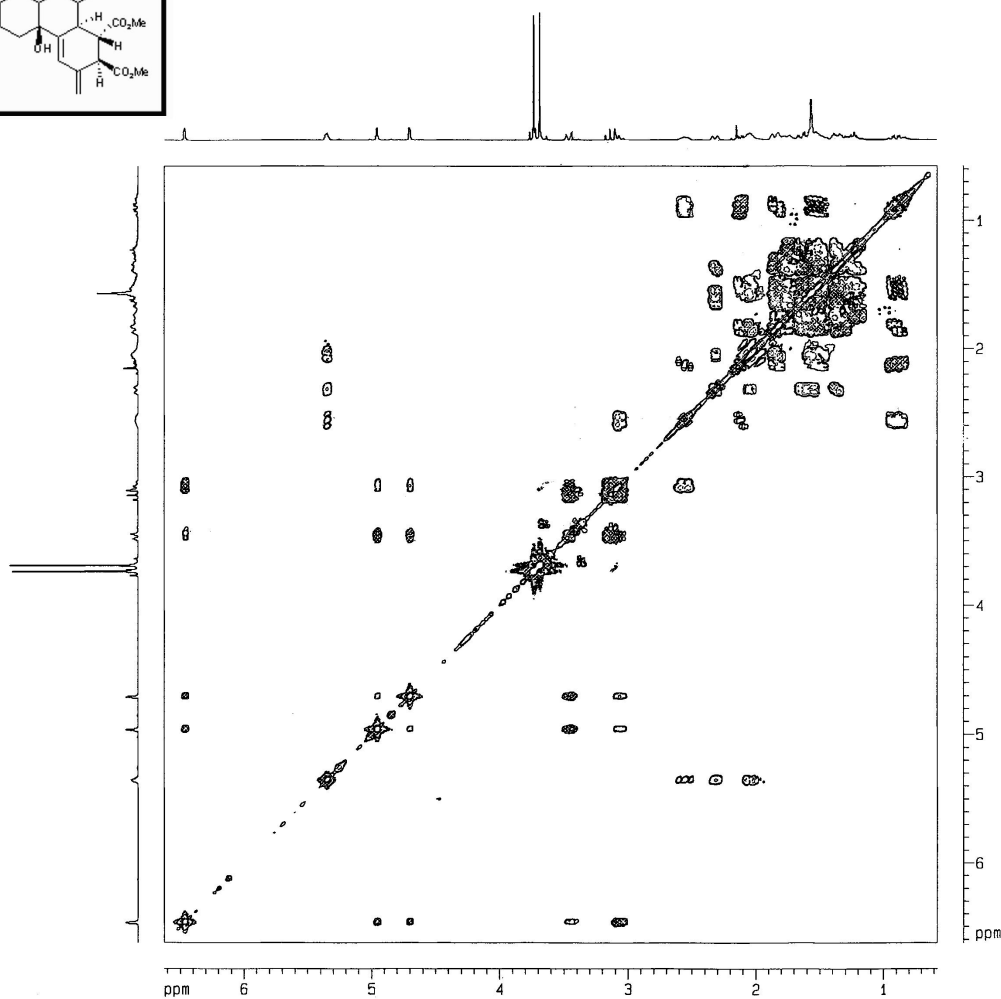

```

Current Data Parameters
NAME          re_630_2d
EXPNO         2
PROCNO        1

F2 - Acquisition Parameters
Date_         040604
Time          21.31
INSTRUM       spect
PROBHD        5 mm QNP 1H/1
PULPROG       zgpg30
TD            1024
SOLVENT       CDCl3
NS            20
DS            0
SWH           1616.800 Hz
FIDRES       1.774278 Hz
AQ           0.2618546 sec
RG           256.5
AQ           276.500 usec
DE           8.50 usec
TE           300.0 K
d0           0.0000300 sec
d1           1.0000000 sec
d13          0.0000400 sec
d16          0.0010000 sec
dno          0.0000040 sec
HOREST       0.0000000 sec
HOREP        1.0000000 sec

----- CHANNEL f1 -----
NUC1          13
P0            5.25 usec
P1            10.50 usec
PL1          -3.00 dB
SFO1         300.1310812 MHz

----- GRADIENT CHANNEL -----
GPM1H1       sine.100
GPM1H2       sine.100
GPI1         0.00 %
GPI2         0.00 %
GPI3         0.00 %
GPI4         0.00 %
GPI5         10.00 %
GPI6         10.00 %
P16          1000.00 usec

F1 - Acquisition parameters
NO          1
TD          256
SFO1        300.13111 MHz
FIDRES       7.097111 Hz
SN           0.054

F2 - Processing parameters
SI          1024
SF          300.1300000 MHz
WDW         SINE
SSB          0
LB           0.00 Hz
GB           0
PC           1.00

F1 - Processing parameters
SI           256
HC2          0
SF          300.1300000 MHz
WDW         SINE
SSB          0
LB           0.00 Hz
GB           0

----- 2D NMR plot parameters -----
CX2          15.00 cm
CX1          15.00 cm
F2P0         6.629 ppm
F2L0         1989.00 Hz
F2PH         0.578 ppm
F2PL         172.74 Hz
F1P0         0.609 ppm
F1L0         1989.00 Hz
F1PH         0.578 ppm
F1PL         172.74 Hz
F2PHCH       0.40327 ppm/cm
F2PLCH       121.12403 Hz/cm
F1PHCH       0.40327 ppm/cm
F1PLCH       121.12403 Hz/cm
    
```

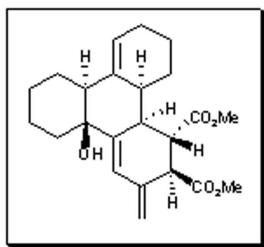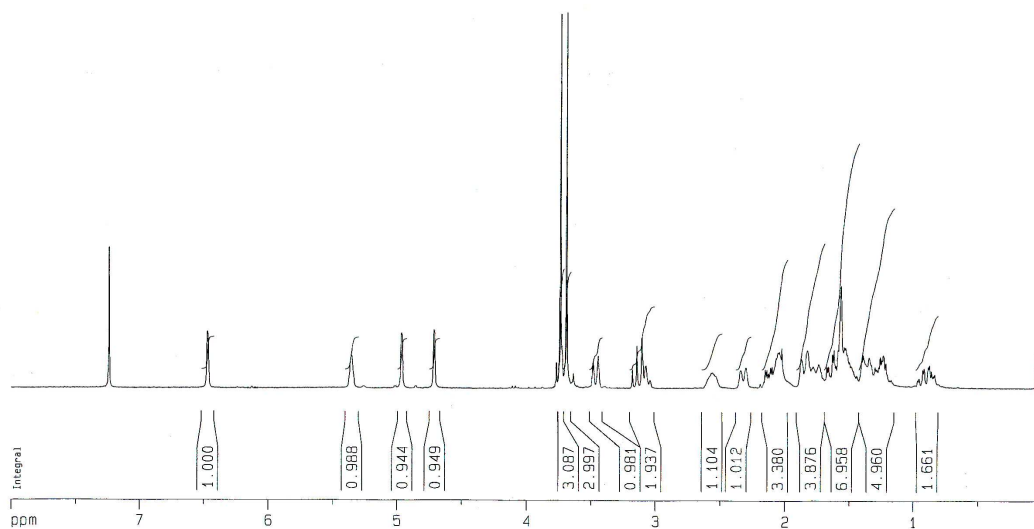

Current Data Parameters  
 NAME rc\_630  
 EXPNO 1  
 PROCNO 1

F2 - Acquisition Parameters  
 Date\_ 20040211  
 Time 16.20  
 INSTRUM av300  
 PROBHD 5 mm QNP 1H/1  
 PULPROG zg30  
 TD 30720  
 SOLVENT CDCl3  
 NS 16  
 DS 0  
 SWH 5081.301 Hz  
 FIDRES 0.165407 Hz  
 AQ 3.0228980 sec  
 RG 406.4  
 DW 98.400 usec  
 DE 6.00 usec  
 TE 300.0 K  
 D1 1.00000000 sec

===== CHANNEL f1 =====  
 NUC1 1H  
 P1 10.50 usec  
 PL1 -3.00 dB  
 SFO1 300.1319477 MHz

F2 - Processing parameters  
 SI 65536  
 SF 300.1300000 MHz  
 WDW EM  
 SSB 0  
 LB 0.10 Hz  
 GB 0  
 PC 1.00

1D NMR plot parameters  
 CX 20.00 cm  
 CY 10.00 cm  
 F1P 8.000 ppm  
 F1 2401.04 Hz  
 F2P 0.000 ppm  
 F2 0.00 Hz  
 PPMCM 0.40000 ppm/cm  
 HZCM 120.05200 Hz/cm

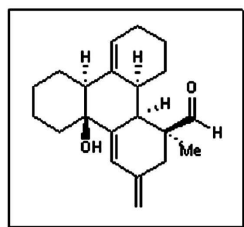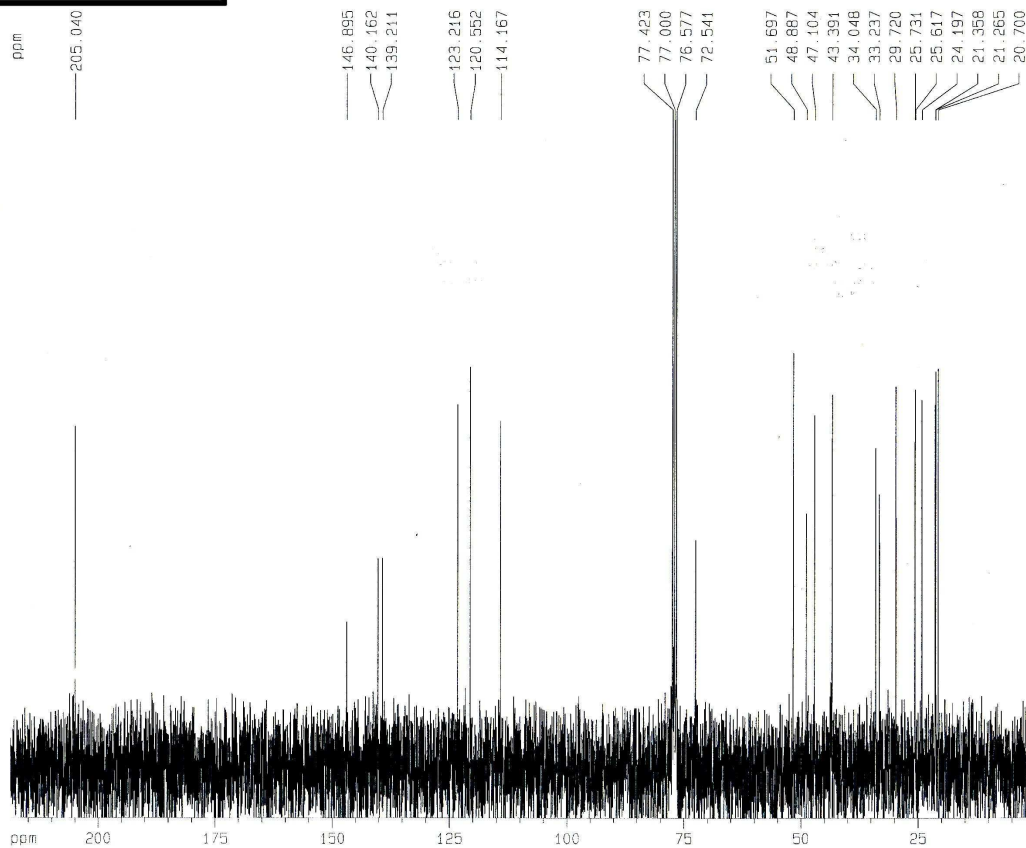

Current Data Parameters  
 NAME rc\_658\_e  
 EXPNO 2  
 PROCNO 1

F2 - Acquisition Parameters  
 Date\_ 20040308  
 Time 12.08  
 INSTRUM av300  
 PROBHD 5 mm QNP 1H/1  
 PULPROG zgpg30  
 TO 32768  
 SOLVENT CDCl3  
 NS 99  
 DS 0  
 SWH 17985.611 Hz  
 FIDRES 0.548877 Hz  
 AQ 0.9110004 sec  
 RG 143.7  
 DW 27.800 usec  
 DE 6.00 usec  
 TE 300.2 K  
 D1 1.0000000 sec  
 d11 0.0300000 sec  
 d12 0.0000200 sec

\*\*\*\*\* CHANNEL f1 \*\*\*\*\*  
 NUC1 13C  
 P1 5.00 usec  
 PL1 -6.00 dB  
 SF01 75.4752653 MHz

\*\*\*\*\* CHANNEL f2 \*\*\*\*\*  
 CPDPRG2 waltz16  
 NUC2 1H  
 PCPD2 70.00 usec  
 PL2 -3.00 dB  
 PL12 13.46 dB  
 PL13 15.63 dB  
 SF02 300.1314860 MHz

F2 - Processing parameters  
 SI 65536  
 SF 75.4677486 MHz  
 WDW EM  
 SSB 0  
 LB 1.00 Hz  
 GB 0  
 PC 1.40

10 NMR plot parameters  
 CX 20.00 cm  
 CY 8.00 cm  
 F1P 220.000 ppm  
 F1 16602.90 Hz  
 F2P 0.000 ppm  
 F2 0.00 Hz  
 PPMCM 11.00000 ppm/cm  
 HZCM 830.14520 Hz/cm

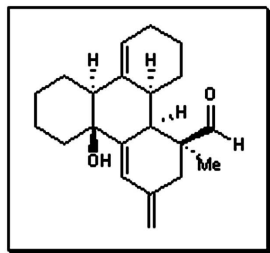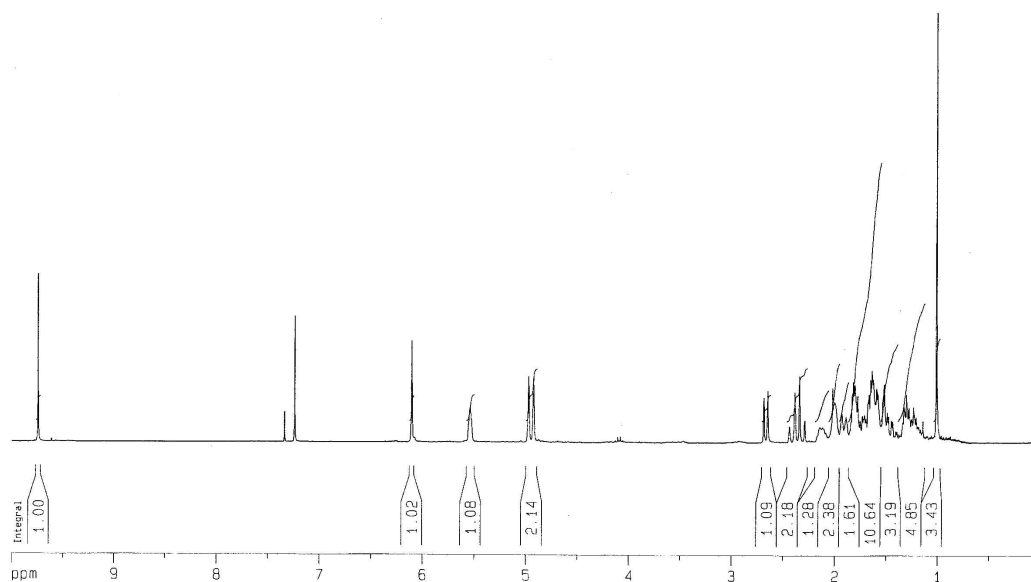

Current Data Parameters  
NAME rc\_658\_c  
EXPNO 1  
PROCNO 1

F2 - Acquisition Parameters  
Date\_ 20040308  
Time 12.05  
INSTRUM av300  
PROBHD 5 mm QNP 1H/1  
PULPROG zg30  
TD 30720  
SOLVENT CDC13  
NS 16  
DS 0  
SWH 5081.304 Hz  
FIDRES 0.165407 Hz  
AQ 3.0228980 sec  
RG 256  
DW 98.400 usec  
DE 6.00 usec  
TE 300.0 K  
D1 1.00000000 sec

===== CHANNEL f1 =====  
NUC1 1H  
P1 10.50 usec  
PL1 -3.00 dB  
SFO1 300.1319477 MHz

F2 - Processing parameters  
SI 65536  
SF 300.1300000 MHz  
WDW EM  
SSB 0  
LB 0.10 Hz  
GB 0  
PC 1.00

1D NMR plot parameters  
CX 20.00 cm  
CY 10.00 cm  
F1P 10.000 ppm  
F1 3001.30 Hz  
F2P 0.000 ppm  
F2 0.00 Hz  
PPMCM 0.50000 ppm/cm  
HZCM 150.06500 Hz/cm

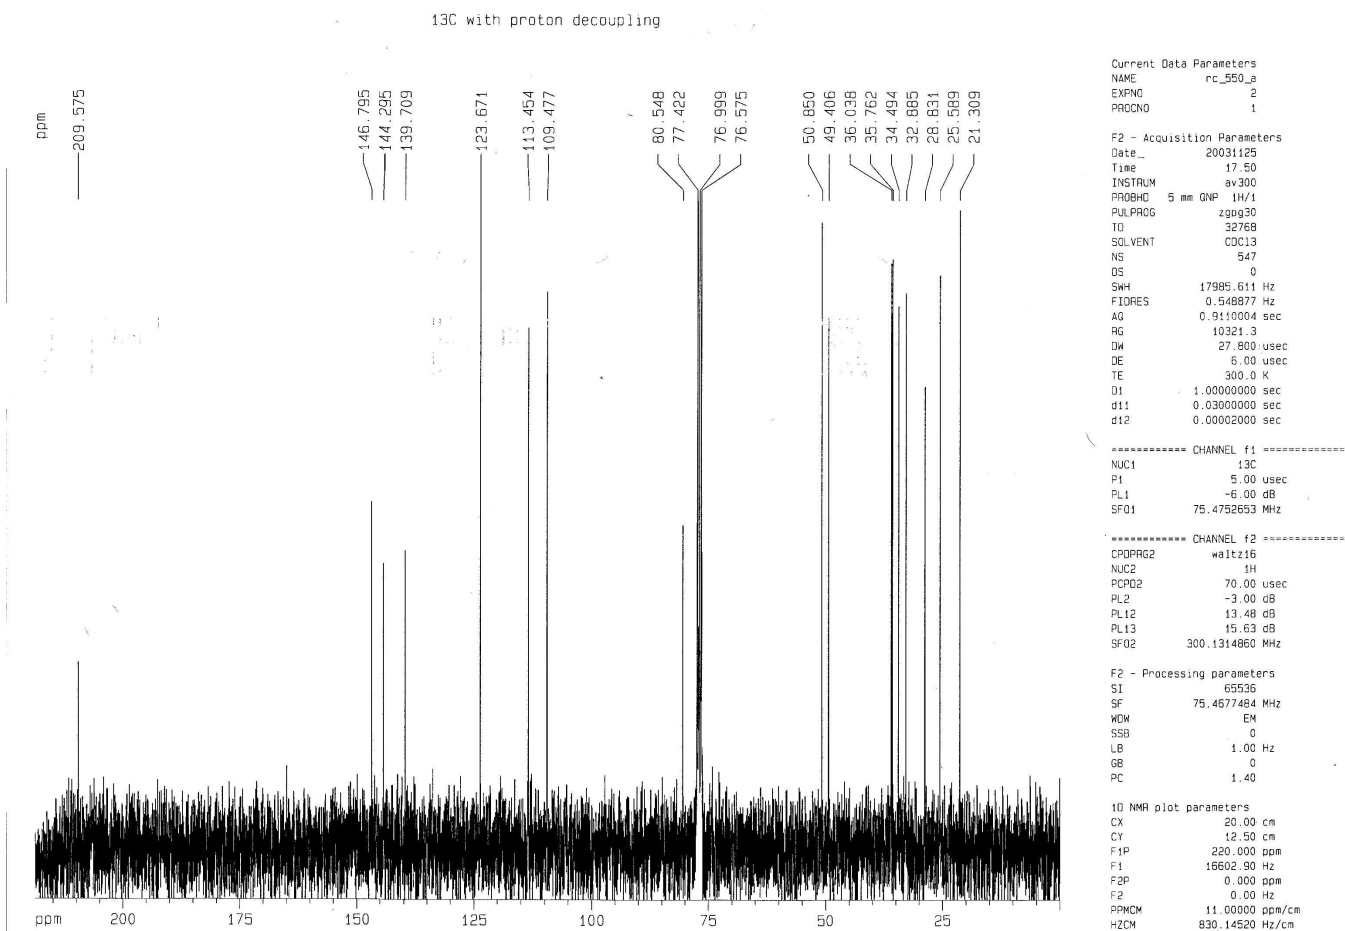



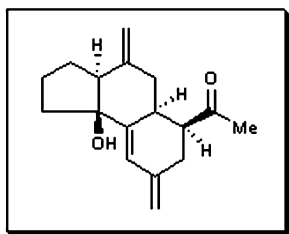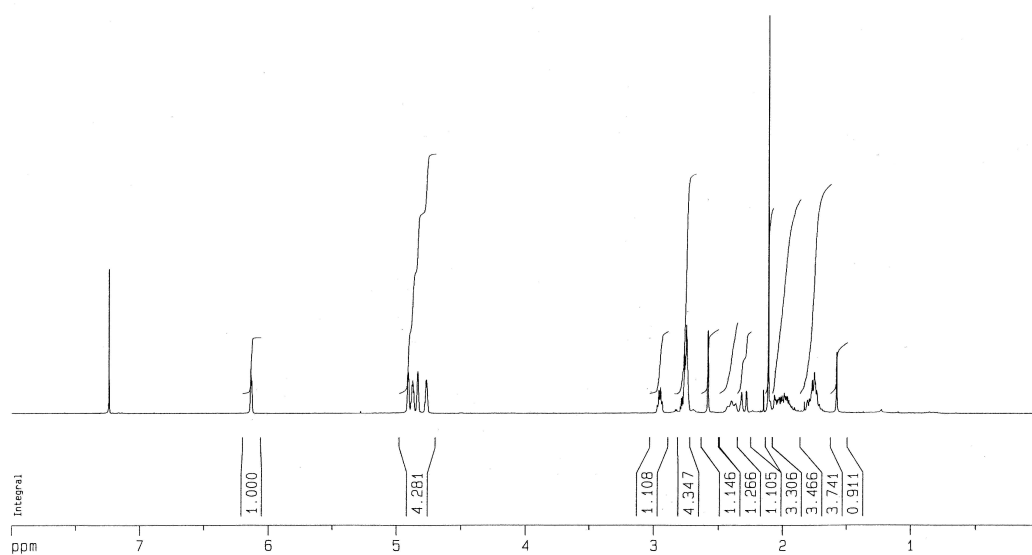

Current Data Parameters  
 NAME rc\_550\_a  
 EXPNO 1  
 PROCNO 1

F2 - Acquisition Parameters  
 Date\_ 20031125  
 Time 17.48  
 INSTRUM av300  
 PROBHD 5 mm GNP 1H/1  
 PULPROG zg30  
 TD 30720  
 SOLVENT CDCl3  
 NS 32  
 DS 0  
 SMH 5081.301 Hz  
 FIDRES 0.165407 Hz  
 AQ 3.0228980 sec  
 RG 406.4  
 DW 98.400 usec  
 DE 6.00 usec  
 TE 300.0 K  
 D1 1.0000000 sec

===== CHANNEL f1 =====  
 NUC1 1H  
 P1 10.50 usec  
 PL1 -3.00 dB  
 SF01 300.1319477 MHz

F2 - Processing parameters  
 SI 65536  
 SF 300.1300000 MHz  
 WDW EM  
 SSB 0  
 LB 0.10 Hz  
 GB 0  
 PC 1.00

1D NMR plot parameters  
 CX 20.00 cm  
 CY 10.00 cm  
 F1P 8.000 ppm  
 F1 2401.04 Hz  
 F2P 0.000 ppm  
 F2 0.00 Hz  
 PPMCM 0.40000 ppm/cm  
 HZCM 120.05200 Hz/cm

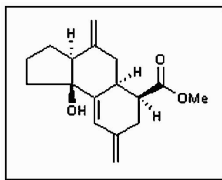

<sup>13</sup>C with proton decoupling

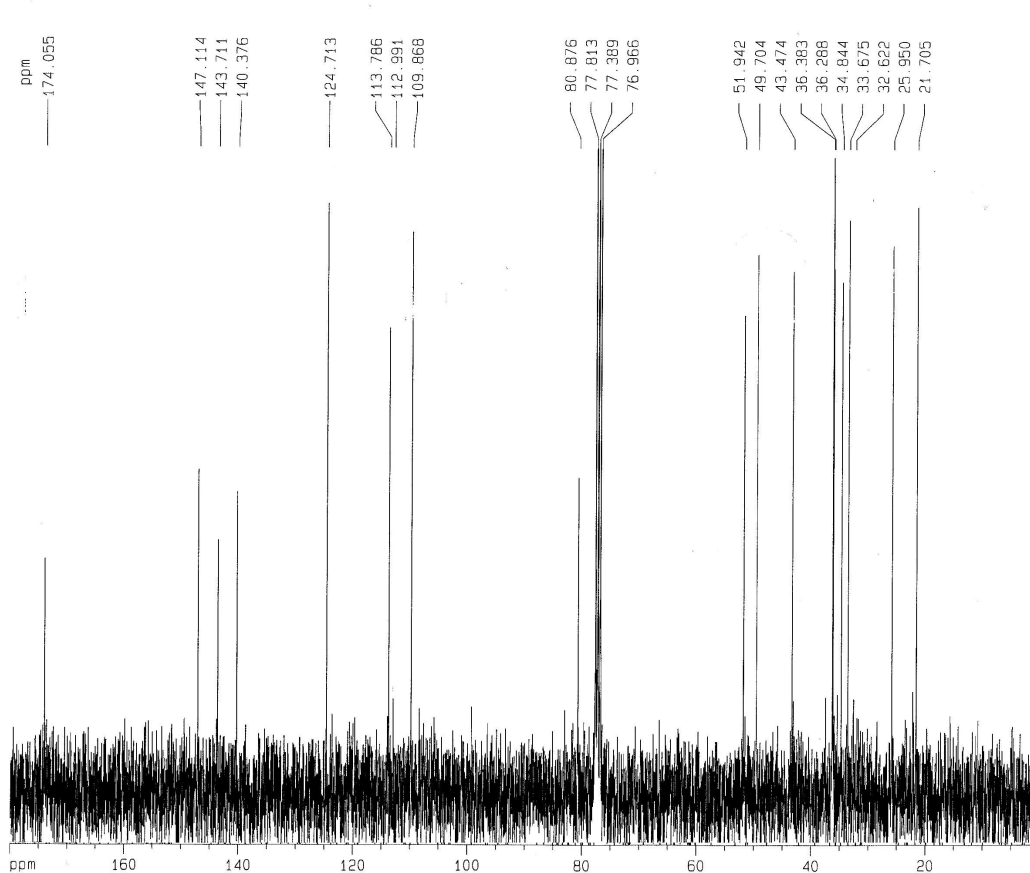

```

Current Data Parameters
NAME          rc_437
EXPNO        2
PROCNO       1

F2 - Acquisition Parameters
Date_        20030916
Time         16.23
INSTRUM      av300
PROBHD       5 mm QNP 1H/1
PULPROG      zgpg30
TD           32768
SOLVENT      CDCl3
NS           318
DS           0
SWH          17985.611 Hz
FIDRES       0.548877 Hz
AQ           0.9110004 sec
RG           5792.6
DM           27.800 usec
DE           6.00 usec
TE           300.0 K
D1           1.0000000 sec
d11          0.0300000 sec
d12          0.0002000 sec

===== CHANNEL f1 =====
NUC1          13C
P1            5.00 usec
PL1           -6.00 dB
SF01          75.4752653 MHz

===== CHANNEL f2 =====
CPDPRG2      waltz16
NUC2          1H
PCPD2        70.00 usec
PL2           -3.00 dB
PL12         13.48 dB
PL13         15.63 dB
SF02          300.1314860 MHz

F2 - Processing parameters
SI            65536
SF            75.4677190 MHz
WDW           EM
SSB           0
LB            1.00 Hz
GB            0
PC            1.40

1D NMR plot parameters
CX            20.00 cm
CY            12.50 cm
F1P          180.000 ppm
F1           13584.19 Hz
F2P           0.000 ppm
F2            0.000 Hz
PPMCM        9.00000 ppm/cm
HZCM         679.20947 Hz/cm
    
```

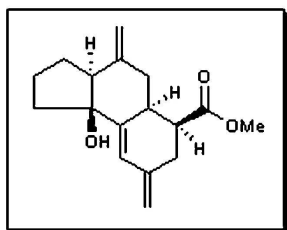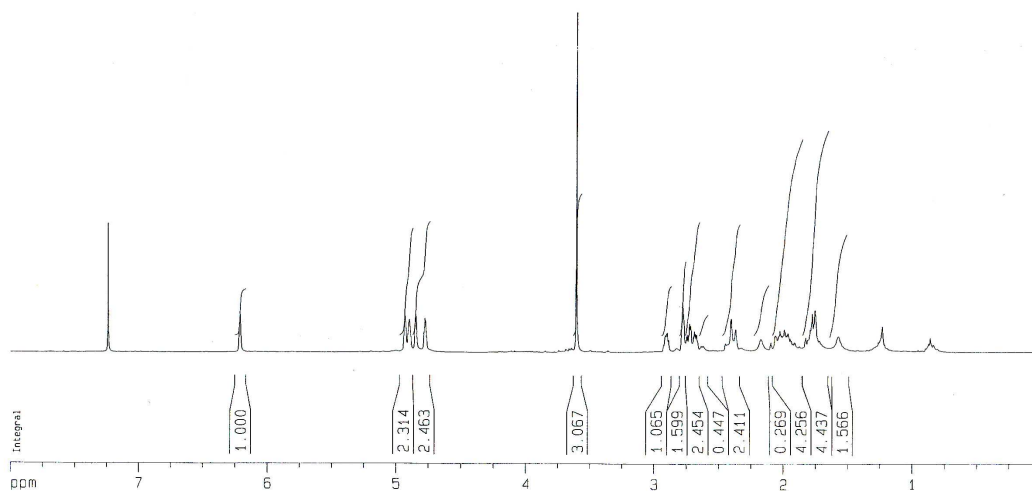

Current Data Parameters  
NAME rc\_437\_(2)  
EXPNO 1  
PROCNO 1

F2 - Acquisition Parameters  
Date\_ 20030918  
Time 15.49  
INSTRUM av300  
PROBHD 5 mm QNP 1H/1  
PULPROG zg30  
TD 30720  
SOLVENT CDCl3  
NS 121  
DS 0  
SWH 5081.301 Hz  
FIDRES 0.165407 Hz  
AQ 3.0228980 sec  
RG 512  
DW 98.400 usec  
DE 6.00 usec  
TE 300.0 K  
D1 1.00000000 sec

\*\*\*\*\* CHANNEL f1 \*\*\*\*\*  
NUC1 1H  
P1 10.50 usec  
PL1 -3.00 dB  
SFO1 300.1319477 MHz

F2 - Processing parameters  
SI 65536  
SF 300.1300000 MHz  
WDW EM  
SSB 0  
LB 0.10 Hz  
GB 0  
PC 1.00

1D NMR plot parameters  
CX 20.00 cm  
CY 10.00 cm  
F1P 8.000 ppm  
F1 2401.04 Hz  
F2P 0.000 ppm  
F2 0.00 Hz  
PPMCM 0.40000 ppm/cm  
HZCM 120.05200 Hz/cm

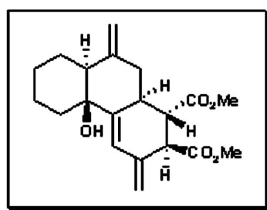

<sup>13</sup>C with proton decoupling

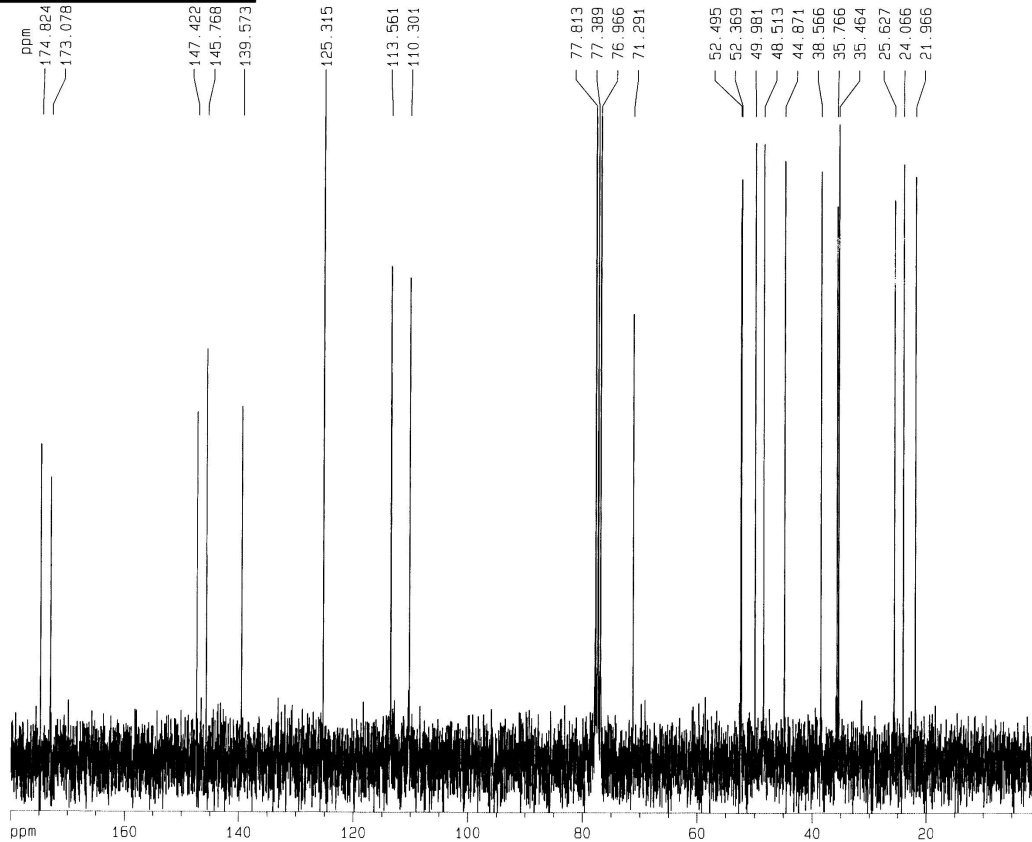

Current Data Parameters  
 NAME rc\_398  
 EXPNO 2  
 PROCNO 1

F2 - Acquisition Parameters  
 Date\_ 20030821  
 Time 16.10  
 INSTRUM av300  
 PROBHD 5 mm GNP 1H/1  
 PULPROG zgpg30  
 TD 32768  
 SOLVENT CDC13  
 NS 213  
 DS 0  
 SWH 17985.611 Hz  
 FIDRES 0.548877 Hz  
 AQ 0.9110004 sec  
 RG 3648.1  
 DW 27.800 usec  
 DE 6.00 usec  
 TE 300.0 K  
 D1 1.0000000 sec  
 d11 0.0300000 sec  
 d12 0.00002000 sec

----- CHANNEL f1 -----  
 NUC1 <sup>13</sup>C  
 P1 5.00 usec  
 PL1 -6.00 dB  
 SFO1 75.4752653 MHz

----- CHANNEL f2 -----  
 CPDPRG2 waltz16  
 NUC2 <sup>1</sup>H  
 PCPD2 70.00 usec  
 PL2 -3.00 dB  
 PL12 13.48 dB  
 PL13 15.63 dB  
 SFO2 300.1314860 MHz

F2 - Processing parameters  
 SI 65536  
 SF 75.4677190 MHz  
 WDW EM  
 SSB 0  
 LB 1.00 Hz  
 GB 0  
 PC 1.40

10 NMR plot parameters  
 CX 20.00 cm  
 CY 12.50 cm  
 F1P 180.000 ppm  
 F1 13584.19 Hz  
 F2P 0.000 ppm  
 F2 0.00 Hz  
 FPMCM 9.00000 ppm/cm  
 HZCM 679.20947 Hz/cm

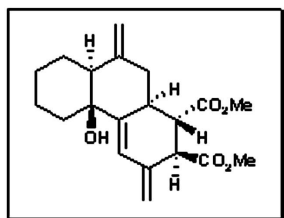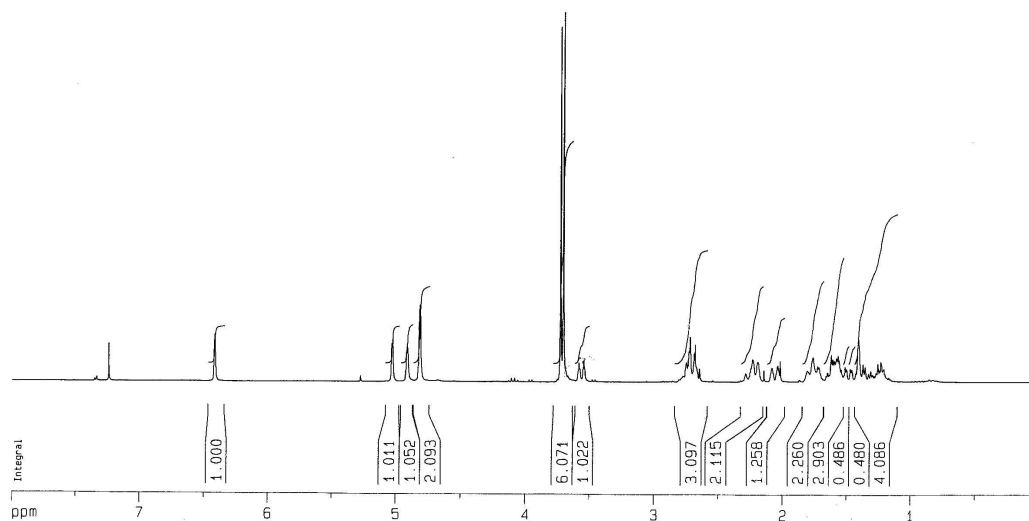

Current Data Parameters  
NAME rc\_398  
EXPNO 1  
PROCNO 1

F2 - Acquisition Parameters  
Date\_ 20030821  
Time 16.05  
INSTRUM av300  
PROBHD 5 mm QNP 1H/1  
PULPROG zg30  
TD 30720  
SOLVENT CDCl3  
NS 32  
DS 0  
SWH 5081.301 Hz  
FIDRES 0.165407 Hz  
AQ 3.0228980 sec  
RG 203.2  
DW 98.400 usec  
DE 6.00 usec  
TE 300.0 K  
D1 1.00000000 sec

===== CHANNEL f1 =====  
NUC1 1H  
P1 10.50 usec  
PL1 -3.00 dB  
SF01 300.1319477 MHz

F2 - Processing parameters  
SI 65536  
SF 300.1300000 MHz  
WDW EM  
SSB 0  
LB 0.10 Hz  
GB 0  
PC 1.00

1D NMR plot parameters  
CX 20.00 cm  
CY 10.00 cm  
F1P 8.000 ppm  
F1 2401.04 Hz  
F2P 0.000 ppm  
F2 0.00 Hz  
PPMCM 0.40000 ppm/cm  
HZCM 120.05200 Hz/cm

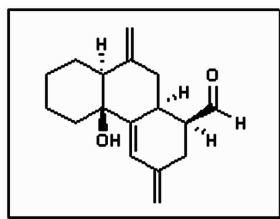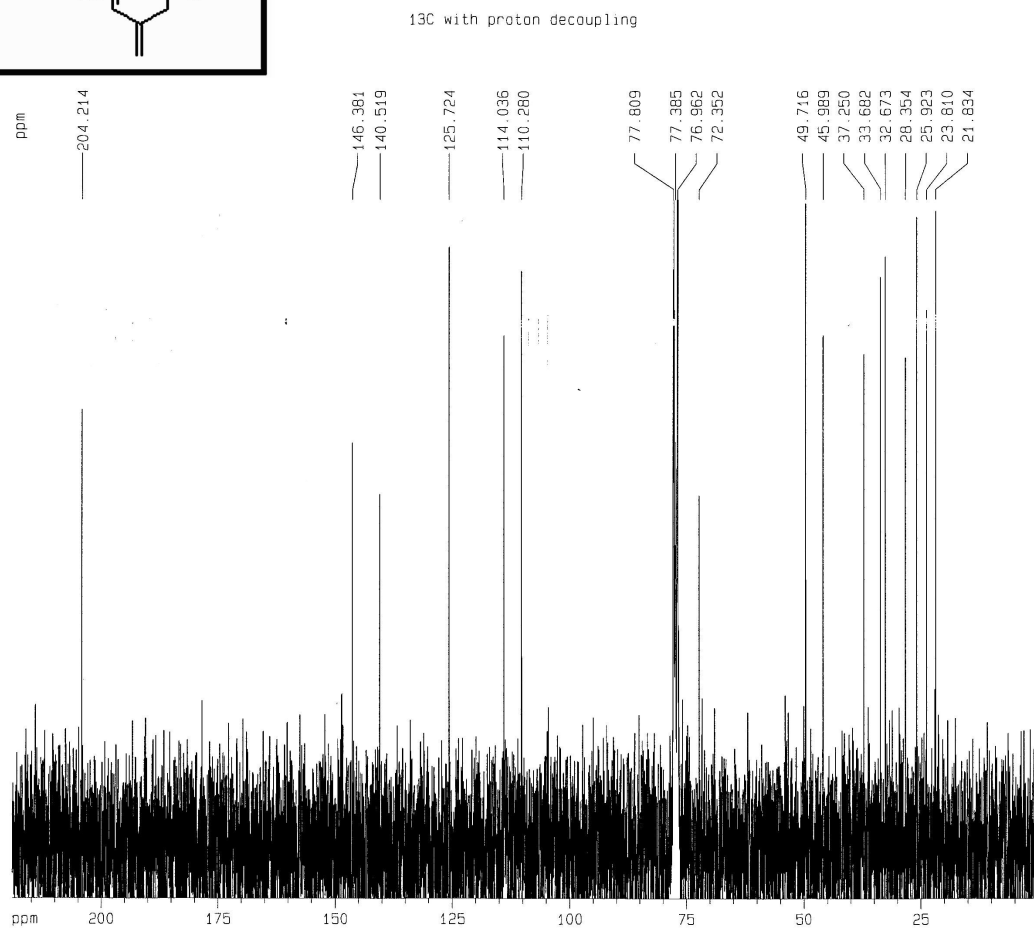

Current Data Parameters  
NAME rc\_544\_1  
EXPNO 2  
PROCNO 1

F2 - Acquisition Parameters  
Date\_ 20031121  
Time 17.03  
INSTRUM av300  
PROBHD 5 mm GNP 1H/1  
PULPROG zgpg30  
TD 32768  
SOLVENT CDCl3  
NS 627  
DS 0  
SWH 17985.611 Hz  
FIDRES 0.548877 Hz  
AQ 0.9110004 sec  
RG 6502  
DW 27.800 usec  
DE 6.00 usec  
TE 300.0 K  
D1 1.00000000 sec  
d11 0.03000000 sec  
d12 0.00020000 sec

----- CHANNEL f1 -----  
NUC1 13C  
P1 5.00 usec  
PL1 -6.00 dB  
SF01 75.4752653 MHz

----- CHANNEL f2 -----  
CPOPRG2 waltz16  
NUC2 1H  
PCPD2 70.00 usec  
PL2 -3.00 dB  
PL12 13.46 dB  
PL13 15.65 dB  
SF02 300.1314860 MHz

F2 - Processing parameters  
SI 65536  
SF 75.4677190 MHz  
WDW EM  
SSB 0  
LB 1.00 Hz  
GB 0  
FC 1.40

1D NMR plot parameters  
CX 20.00 cm  
CY 12.50 cm  
F1P 220.000 ppm  
F1 16602.90 Hz  
F2P 0.000 ppm  
F2 0.00 Hz  
PPMCM 11.00000 ppm/cm  
HZCM 830.14490 Hz/cm

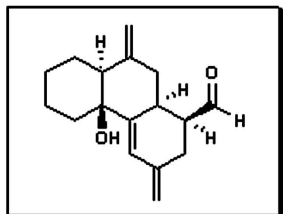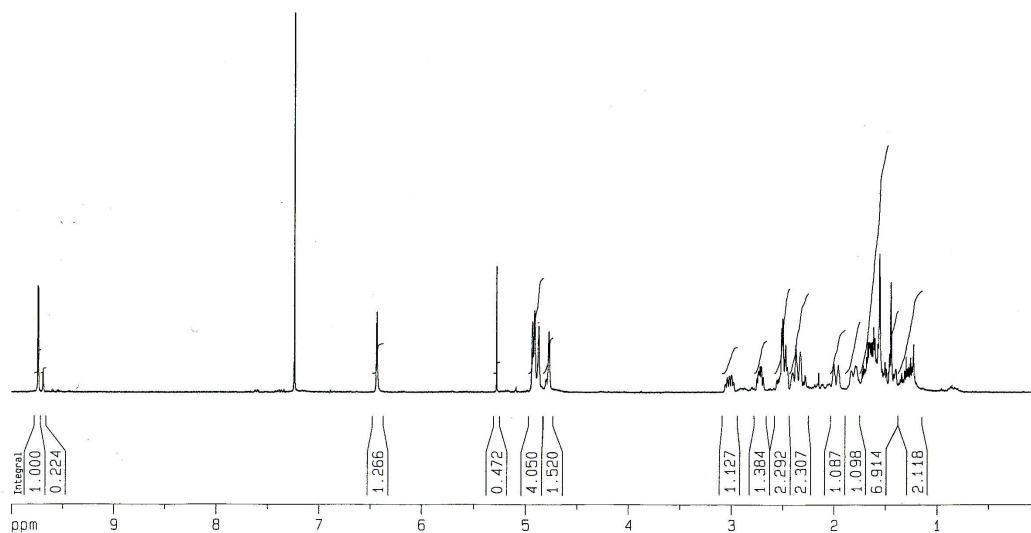

Current Data Parameters  
NAME rc\_544\_1  
EXPNO 1  
PROCNO 1

F2 - Acquisition Parameters  
Date\_ 20031121  
Time 16.57  
INSTRUM av300  
PROBHD 5 mm QNP 1H/1  
PULPROG zg30  
TD 30720  
SOLVENT CDCl3  
NS 16  
DS 0  
SWH 5081.301 Hz  
FIDRES 0.165407 Hz  
AQ 3.0228980 sec  
RG 456.1  
DW 98.400 usec  
DE 6.00 usec  
TE 300.0 K  
D1 1.00000000 sec

===== CHANNEL f1 =====  
NUC1 1H  
P1 10.50 usec  
PL1 -3.00 dB  
SF01 300.1319477 MHz

F2 - Processing parameters  
SI 65536  
SF 300.1300000 MHz  
WDW EM  
SSB 0  
LB 0.10 Hz  
GB 0  
PC 1.00

1D NMR plot parameters  
CX 20.00 cm  
CY 10.00 cm  
F1P 10.000 ppm  
F1 3001.30 Hz  
F2P 0.000 ppm  
F2 0.00 Hz  
PPMCM 0.50000 ppm/cm  
HZCM 150.06500 Hz/cm

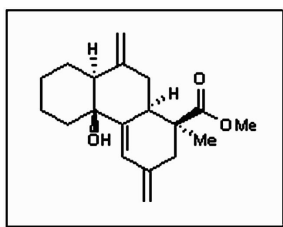

<sup>13</sup>C with proton decoupling

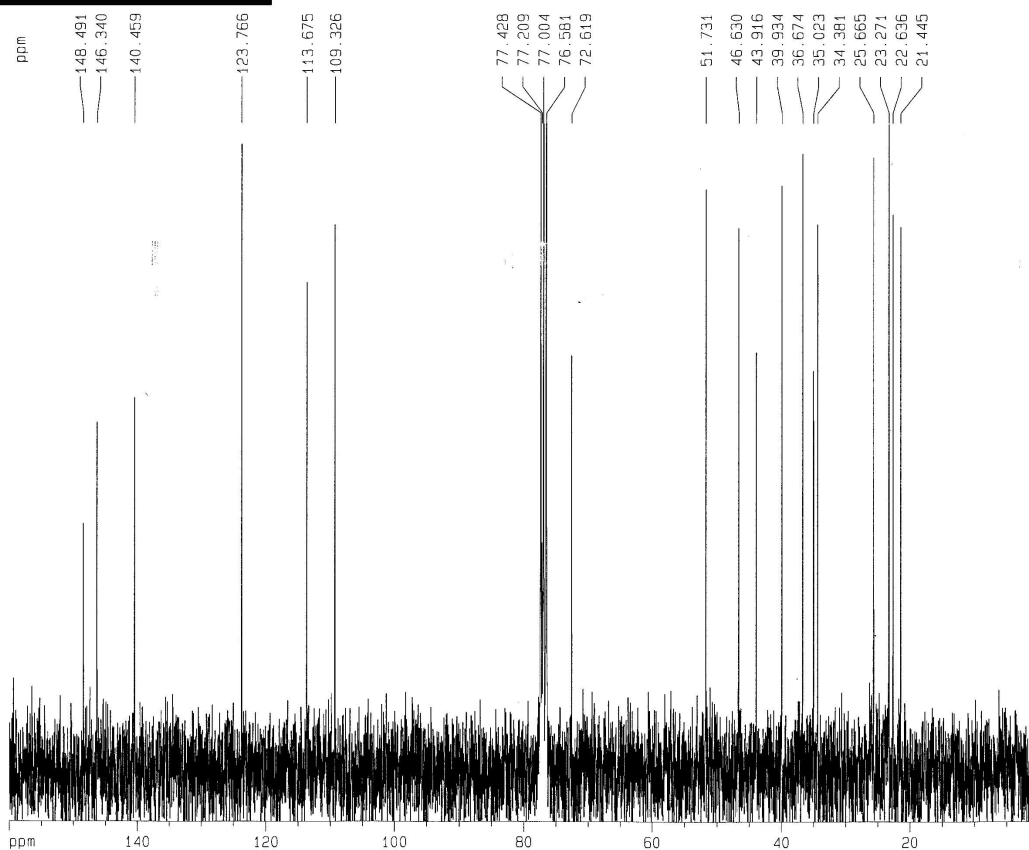

```

Current Data Parameters
NAME          nc_509
EXPNO        2
PROCNO       1

F2 - Acquisition Parameters
Date_        20031104
Time         17.08
INSTRUM     av300
PROBHD      5 mm GNP 1H/1
PULPROG     zgpg30
TD          32768
SOLVENT     CDCl3
NS          399
DS          0
SWH         17985.611 Hz
FIDRES      0.549877 Hz
AQ          0.9110004 sec
RG          7296.2
DN         27.800 usec
DE         6.00 usec
TE         300.0 K
D1         1.00000000 sec
d11        0.03000000 sec
d12        0.00002000 sec

----- CHANNEL f1 -----
NUC1        13C
P1          5.00 usec
PL1         -6.00 dB
SF01       75.4752653 MHz

----- CHANNEL f2 -----
CPOPRG2     waltz16
NUC2        1H
PCPD2       70.00 usec
PL2         -3.00 dB
PL12        13.46 dB
PL13        15.63 dB
SF02       300.1314860 MHz

F2 - Processing parameters
SI          65936
SF          75.4677478 MHz
WDW         EM
SSB         0
LB          1.00 Hz
GB          0
PC          1.40

ID NMR plot parameters
CX          20.00 cm
CY          12.50 cm
F1P         160.000 ppm
F1          12074.84 Hz
F2P         0.000 ppm
F2          0.00 Hz
PPMCM       8.00000 ppm/cm
HZCM        603.74200 Hz/cm
    
```



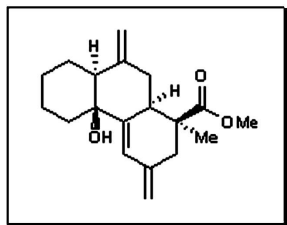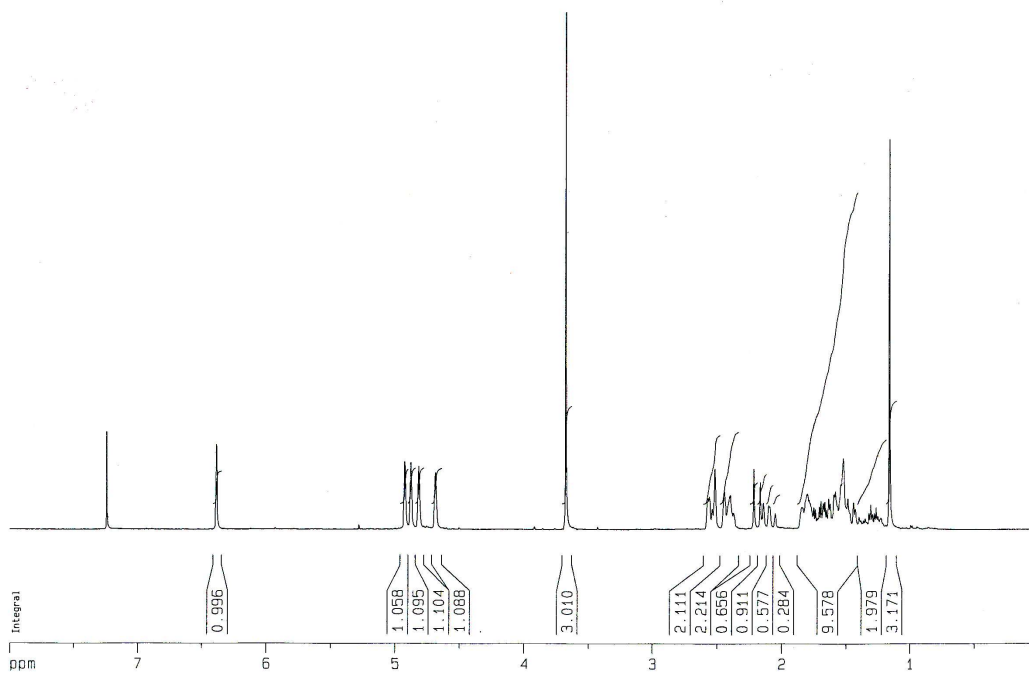

Current Data Parameters  
NAME rc\_508  
EXPNO 1  
PROCNO 1

F2 - Acquisition Parameters  
Date\_ 20031104  
Time 17.04  
INSTRUM av300  
PROBHD 5 mm QNP 1H/1  
PULPROG zg30  
TD 30720  
SOLVENT CDCl3  
NS 32  
DS 0  
SWH 5081.301 Hz  
FIDRES 0.165407 Hz  
AQ 3.0228980 sec  
RG 362  
DW 98.400 usec  
DE 6.00 usec  
TE 300.0 K  
D1 1.00000000 sec

\*\*\*\*\* CHANNEL f1 \*\*\*\*\*  
NUC1 1H  
P1 10.50 usec  
PL1 -3.00 dB  
SF01 300.1319477 MHz

F2 - Processing parameters  
SI 65536  
SF 300.1300000 MHz  
WDW EM  
SSB 0  
LB 0.10 Hz  
GB 0  
PC 1.00

1D NMR plot parameters  
CX 20.00 cm  
CY 10.00 cm  
F1P 8.000 ppm  
F1 2401.04 Hz  
F2P 0.000 ppm  
F2 0.00 Hz  
PPMCM 0.40000 ppm/cm  
HZCM 120.05200 Hz/cm

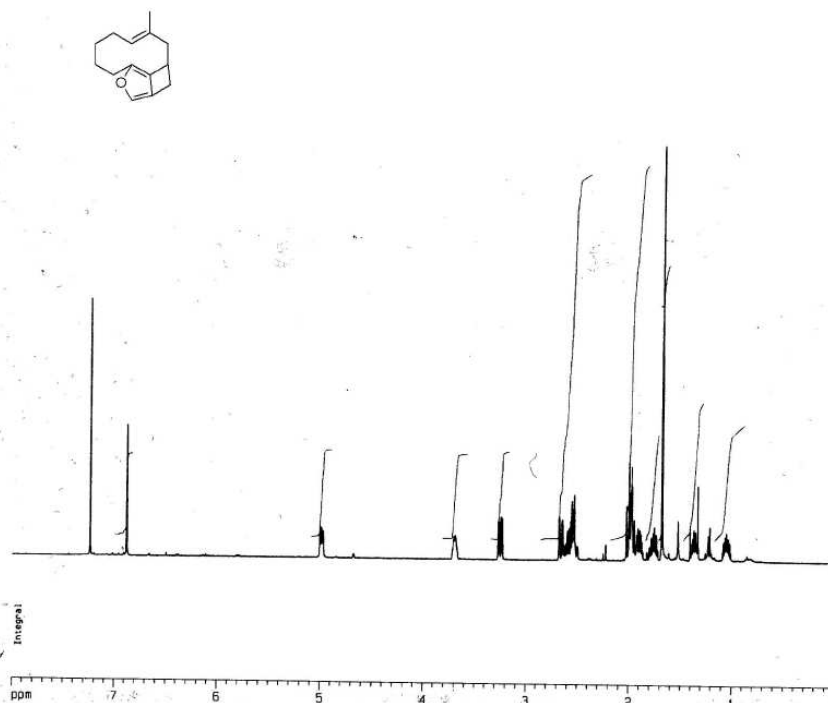

Current Data Parameters  
 NAME cmg672top  
 EXPNO 1  
 PROCNO 1

F2 - Acquisition Parameters  
 Date\_ 20060420  
 Time 18.19  
 INSTRUM AV500MB  
 PROBHD 5 mm TBO BB/1H  
 PULPROG zg30  
 TO 65536  
 SOLVENT Acetone  
 NS 16  
 DS 0  
 SWH 7440.476 Hz  
 FIDRES 0.113533 Hz  
 AQ 4.4048594 sec  
 RG 203.2  
 DW 67.200 usec  
 DE 6.00 usec  
 TE 300.0 K  
 D1 0.01000000 sec

\*\*\*\*\* CHANNEL f1 \*\*\*\*\*  
 NUC1 1H  
 P1 13.50 usec  
 PL1 0.00 dB  
 SFO1 500.1327766 MHz

F2 - Processing parameters  
 SI 65536  
 SF 500.1300049 MHz  
 WM EM  
 SSB 0  
 LB 0.00 Hz  
 GB 0  
 PC 1.00

ID NMR plot parameters  
 CX 20.00 cm  
 CY 10.00 cm  
 F1P 8.000 ppm  
 F1 4001.04 Hz  
 F2P 0.000 ppm  
 F2 0.00 Hz  
 PPMCM 0.40000 ppm/cm  
 HZCM 200.05200 Hz/cm

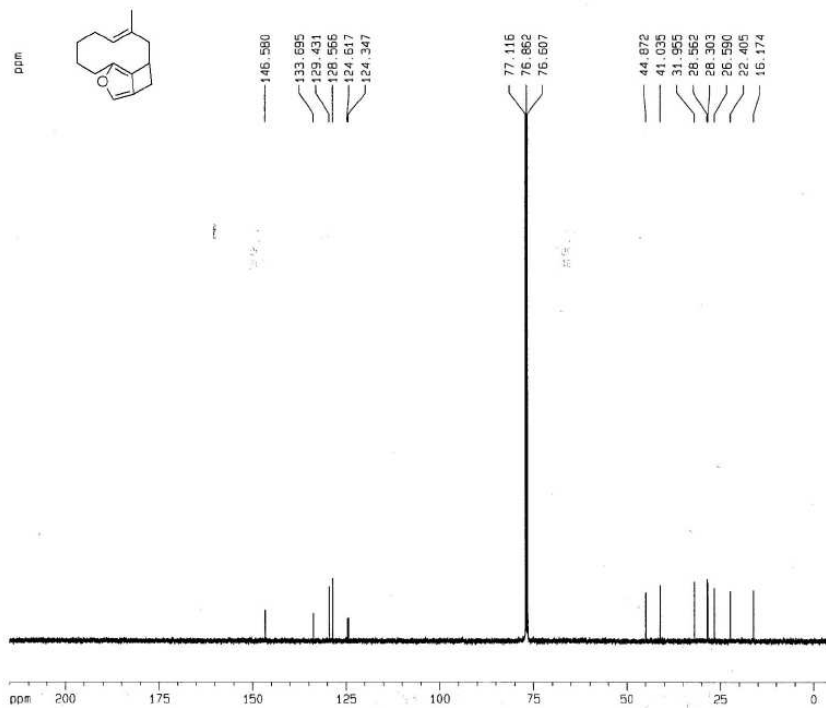

Current Data Parameters  
 NAME cmg672top  
 EXPNO 2  
 PROCNO 1

F2 - Acquisition Parameters  
 Date\_ 20060420  
 Time 18.25  
 INSTRUM AV500MB  
 PROBHD 5 mm TBO BB/1H  
 PULPROG zgpg30  
 TO 65536  
 SOLVENT CDCl3  
 NS 1024  
 DS 0  
 SWH 30030.029 Hz  
 FIDRES 0.458222 Hz  
 AQ 1.0512244 sec  
 RG 14600  
 DW 16.650 usec  
 DE 40.00 usec  
 TE 300.0 K  
 D1 1.00000000 sec  
 d11 0.63000000 sec  
 d12 0.60000000 sec

\*\*\*\*\* CHANNEL f1 \*\*\*\*\*  
 NUC1 13C  
 P1 13.25 usec  
 PL1 -3.00 dB  
 SFO1 125.7703643 MHz

\*\*\*\*\* CHANNEL f2 \*\*\*\*\*  
 CPDPRG2 waltz16  
 NUC2 1H  
 PCH2 80.00 usec  
 PL2 0.00 dB  
 PL12 15.46 dB  
 PL13 14.90 dB  
 SFO2 500.1320005 MHz

F2 - Processing parameters  
 SI 32768  
 SF 125.7578951 MHz  
 WM EM  
 SSB 0  
 LB 1.00 Hz  
 GB 0  
 PC 1.00

ID NMR plot parameters  
 CX 20.00 cm  
 CY 20.00 cm  
 F1P 215.000 ppm  
 F1 27037.93 Hz  
 F2P -5.000 ppm  
 F2 -626.75 Hz  
 PPMCM 11.00000 ppm/cm  
 HZCM 1383.33582 Hz/cm

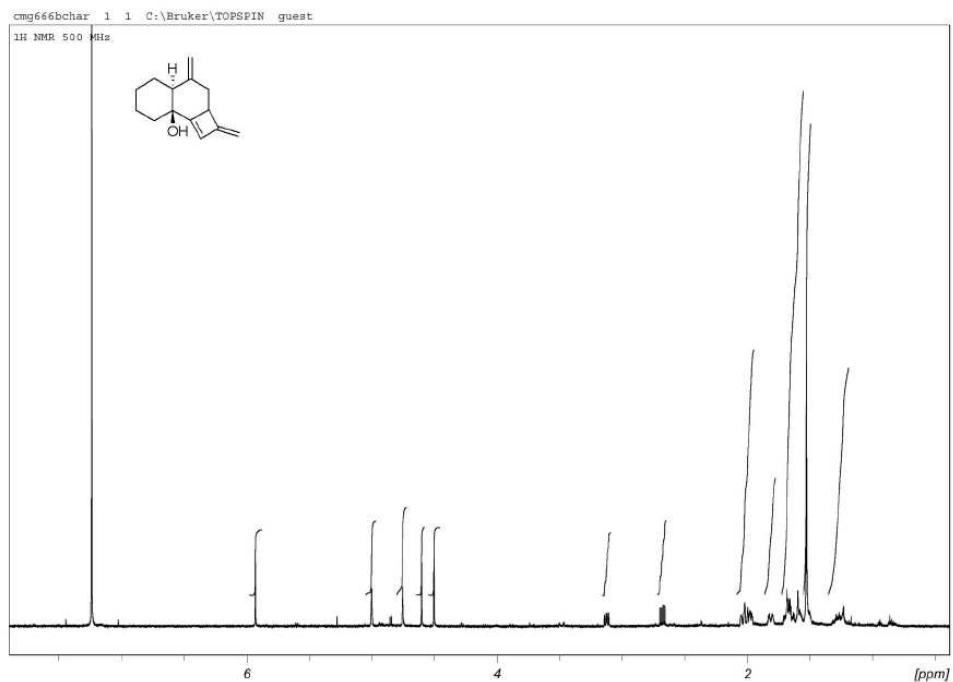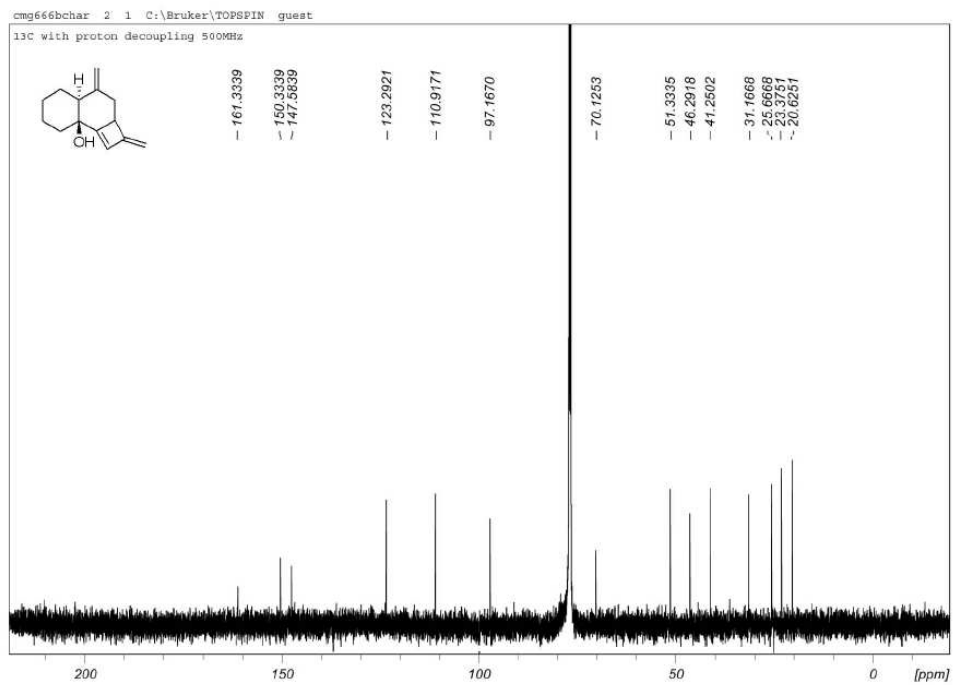

Supplement: b803898h.pdf [file b803898h.pdf]
